# Supplementary material
Source: PubMed Central journal article supplement (PMC3271739)
Supplement: supp_pp.111.184572_184572suppdata.pdf [file supp_pp.111.184572_184572suppdata.pdf]

# Supplemental Table S1

Nelson Dittrich & Devarenne

Supplemental Table S1. Names of all genes used in this study.

| <b>Gene name used in this manuscript</b> | <b>GenBank accession ID</b> | <b>Genomic locus at Phytozome</b> | <b>Transcript name at Phytozome</b> | <b>Alias at Phytozome</b> |
|------------------------------------------|-----------------------------|-----------------------------------|-------------------------------------|---------------------------|
| AtPDK1                                   | AF132742.1                  | n/a                               | n/a                                 | n/a                       |
| SIPDK1                                   | AAW38936.1                  | n/a                               | n/a                                 | n/a                       |
| PpPDK1                                   | JN049607                    | Pp1s217_11V6                      | Pp1s217_11V6.2                      | Phypa_144576              |
| n/a                                      | n/a                         | Pp1s217_11V6                      | Pp1s217_11V6.1                      | Phypa_144576              |
| Pp174181                                 | JN049609                    | Pp1s4_386V6                       | Pp1s4_386V6.1                       | Phypa_174181              |
| Pp188412                                 | JN049610                    | Pp1s118_230V6                     | Pp1s118_230V6.1                     | Phypa_188412              |
| Pp2484                                   | JN049608                    | Pp1s224_73V6                      | Pp1s224_73V6.1                      | Phypa_2484                |

# Supplemental Figure S1

Nelson Dittrich & Devarenne

## A BLAST AtPDK1-1 protein sequence to *P. patens* proteome at Phytozome, top hits:

1. Pp1s217\_11V6.2 (Phypa\_144576), score 369.0, E value 3.0e-102 (1044 nt PpPDK1 transcript)
2. Pp1s217\_11V6.1 (Phypa\_144576), score 370.5, E value 1.2e-102 (1041 nt PpPDK1 transcript)
3. Pp1s118\_230V6 (Phypa\_188412), score 224.2, E value 1.2e-58. Annotated as ribosomal S6 protein kinase and related proteins. BLAST of the cDNA below to TAIR10 cDNAs returned AT3G08730.1 (S6K), AT3G08720.2 (S6K2), and AT3G08720.1 (S6K2) as the top hits
4. Pp1s4\_386V6.1 (Phypa\_174181), score 223.8, E value 1.7e-57. Annotated as ribosomal S6 protein kinase and related proteins. BLAST of the cDNA below to TAIR10 cDNAs returned AT3G08720.2 (S6K2), AT3G08730.1 (S6K), and AT3G08720.1 (S6K2) as the top hits

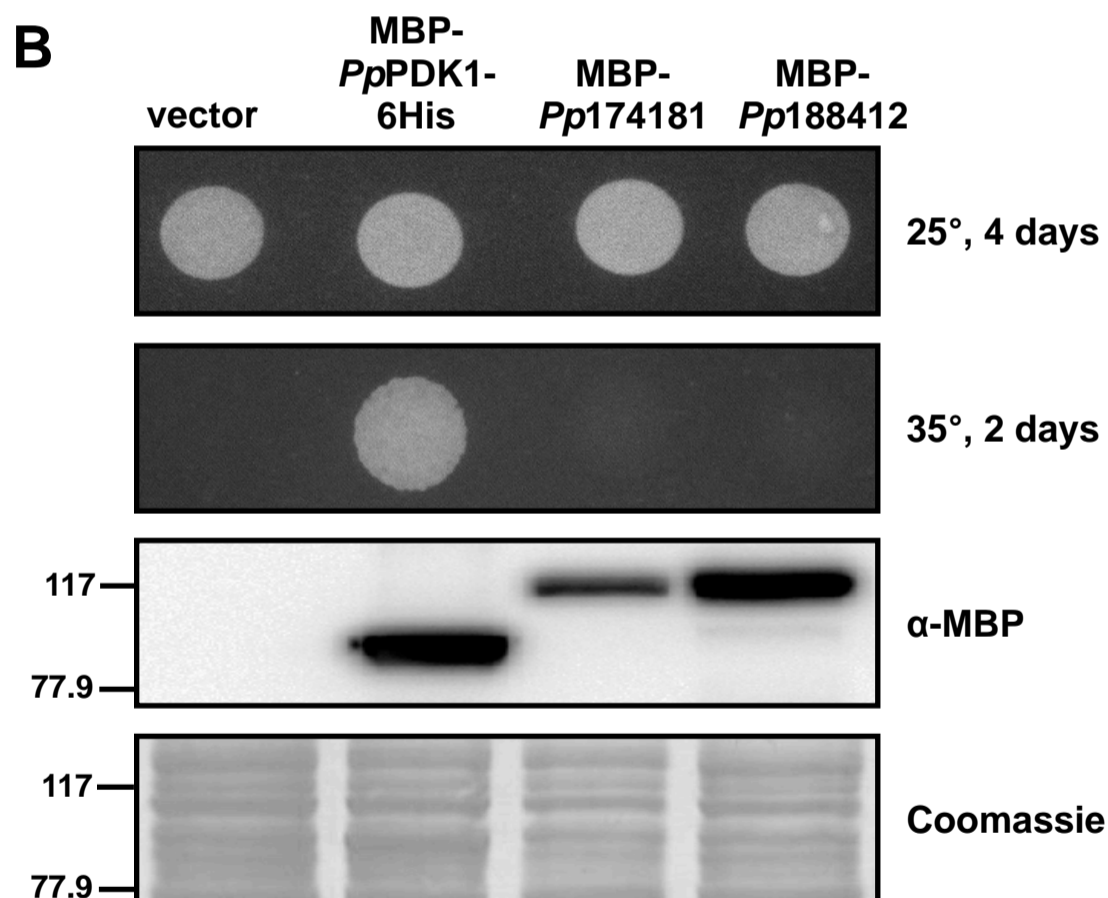

**Supplemental Figure S1.** Evidence for one *PDK1* in the *P. patens* genome. A, The AtPDK1-1 protein sequence (GenBank accession AF132742.1) was used in a BLAST search of the *P. patens* proteome at Phytozome ([www.phytozome.net](http://www.phytozome.net)). The names of the top 4 hits, as well as the score and E value for each, are ranked by E value. The first two hits are alternately spliced transcripts from the same *PDK1* locus. The first hit is *Pp1s217\_11V6.2*, the 1044 nt *PpPDK1* transcript characterized in this manuscript. The second hit is *Pp1s217\_11V6.1*, a 1041 nt *PpPDK1* transcript identical to *Pp1s217\_11V6.2* except that it lacks a single glutamate from the splice junction between exons 5 and 6. The third hit is *Pp1s118\_230V6* (*Pp188412*), a putative ribosomal S6 kinase. The fourth hit is *Pp1s4\_386V6.1* (*Pp174181*), another putative ribosomal S6 kinase, suggesting that the *P. patens* genome contains only one *PDK1*. The cDNA sequences of *Pp188412* and *Pp174181* were used in a BLAST search of *A. thaliana* cDNAs at TAIR ([www.arabidopsis.org](http://www.arabidopsis.org)). The names of the top 3 hits are also shown. The top three hits in both cases were AT3G08730.1 (S6K), AT3G08720.2 (S6K2), and AT3G08720.1 (S6K2). B, *Pp188412* and *Pp174181* are not able to complement a temperature sensitive allele of *S. cerevisiae* *PKH1*. Haploid strain INA106-3B, which lacks *PKH2* and contains temperature-sensitive *PKH1*<sup>D398G</sup>, was transformed with p416GPD containing the indicated constructs under control of the constitutive GPD promoter. Transformed yeast were grown in liquid medium lacking uracil, spotted on plates lacking uracil, and grown at the indicated temperatures and times. Total protein was extracted from cultures grown in liquid medium at 25°C and analyzed by  $\alpha$ -MBP western blot to verify expression of each *PpPDK1*.

# Supplemental Figure S2

Nelson Dittrich & Devarenne

**A** TATAAGTGTGTTGCCACGATTTATATACACTATGGATGTCTCCGTTGTGCATTTCCATGTGTTGATATAAGTTAGAATTGCAATTGATTGA  
ATAGGATGTTGAATCTATTGAGATTATTGAGAATGACCACCAAGCCATGATGCGTGCCTACTATAAGGAGATGATTTTCAAAGACATTGTT  
GATAAGTGTCTAATTTGCAAACATAATTTTCATGGTGGATGGGCTTATTGTAATGGCCGATTTCCACGACTTCAAATTTTTTGTGGTGGAC  
TGGCCTCCATTTTTTCTACCACAAGCATTGTCAAATCCACCTACTTTGTGATGGAGTGGGAGAAGGACGAGTATTGGCAGTGCATCACAAA  
CTTCTTGCTTGAGAATATCCTACATTCTAAACAATTCAACAAAGTATGTCATGATTGACAAGGATGGATGTTTTTTGACAACACTACATAAAT  
GAATTTTCATCCATTCCCTAATTTACCTTAAAATAAAGTAAATTAGGTATTGCAGGGAAATCCTGGGGACCAAGCGAGAGCGAGAGAGCAA  
TGCCGGCGAAAACGACCTCGATTGGCGCCCGTCGAGCAGCATCATCGCCAGACGATGATAGAATCGCGGATTCCCTCCGCACAGCCCTGGA  
TTGTCAGGGTTGCTCCCCCTTGTCTGCTGGAGGCTCGTGATTTTCGTCAGCTTTGCAGCACGCAGCTGCAGTTGAATCGCTGCGTTCTT  
CGCGATTCCGGCCCTGTCTGTGTTGTGATGTGAATGGTGCCGAGGGAATGTTGTGCGGGTGTATTCAGTGCCATGGCTCTAGGATTGGGTGCT  
TGTGGGTGCTGAGGTTGGTGGGCGGCTGTGACGGGGAAGCAGAGGACCTTGGCAGAGGATTCTCGGCACCAACATTACAGGAATGGCCATG  
GATGGGACCTCCCCCGTGTGCGCTGAGCCGAATCAGTCCAAACCTCTCGACCCCAAACAACCTCGTCATGCGTGCACCCGAGATGGATTTTA  
CTTCCAACGATTTCTTGTGTTGCCAAGTTGCTCGGCCCTGGGGTCTATTCAAAGGTGAGCTACGATTTCTCGTTTTCTTGGGCAGACCCGACAT  
GGGATTAATCGCTGTTTGTCAATTGTAAGTAGATACTACATTGTGCGTTTTGTATGACGTTGCTTTGTTTAAATGTGTTGAACCTTGAA  
AAAGGTGGGTGTTCTTTTGTACATCGTCCCATGTTGAATCAGGCATTATGCAATTTTAGGGGATTTTTTTGGATTGTTTCCGAGCGGTTT  
TCGTAATTTGTTGATACTTGAATTTGGGTCTTTCTGAAGTGTCTTAAGAAGGCTGTTGATTTGATGTGCTTTCTTGAACCGGTTCTCA  
TGGTATTATCAATTTAAGCCATAACATGTGAAAGCTGGCGATGAGCAGGTGACAAAAGCGAAGAGGAAGAACACGGGCGAAATATATGCGT  
TGAAGATAATGAACAAGAAGCACATAATTCGTGAGAATAAGGTTAAGTTTGTGAAAATGGAGCGCATGATACTCGACCAGCTCGACCATCC  
GGGCGTAGTGAAGCTATGCTTTACATTCCAGGATGTCCACTCTTTGTGTAATGATCATTCTCGCAAATTTGTTCTGTGTCTGATCGTCTGCA  
CCGCTGTGGATTATTGTCCGTGCAAGTGATCTTAGCTGAGTGCCTGTTAGGCACTTCCAGTACTGAAGAAGACAGACATTTGTTTTAGCCC  
ATATGTCCAACCTGTCAATTATGAGCTTGCTACTAATCAGTCTGATTGATGGACATGCTAGACATGGGGCTTGAATGTTGCACTGGTGGAG  
AACTTTTCGAGCAGATAAGAAGGTACGTAATCATATCCAGCAAGAGTACTTTCGCTTCTTTCTCAATTTGGTTTGTATCATATCAAGATT  
CTGTCCTAAGCAGCCACTATCAGATCTTCCCAACGGCTCGTCCGAATTGCTTCGCTTAAATCATTATCCTAAAGTAGATCTTGTCTTGC  
CAGGATGTGAATACACTACATAAAGGGGATTTGTTAATGTCAATGGCAACTCAATATAATTATCCATTTTTTATTTATTTTAAATGTA  
CAGAGTAAACGGATGTCCGAAGAAGATACTCGATTCTATACAGCGGAGATTGTTGATATTCTGGAGTACATTCATTCCCAAGGCATTGTCC  
ACCGTGATCTTAAGGTAACCCCTTTTGCCTTTTTTGTATACATATGAGTATTAAGTGCTATTCGGACCATGAAAAGCTGCATTGGTACTCG  
GTGCATAGTCTTGTGTTGCTAATTGTGCGATTTTTTTCCAGCATCTTGTATCTGCATAAATTTCTTCTTAGTTGGGATTTCCAGAGTCGCT  
TTGATTGTATTACCTGTTATCACAACTGTGTTGTACGTATGCATCATCACTTCAAACCATGTAAGTTGTCGAGATCTCCAGTGAGCCCCTT  
GACCTCCAATTTACGATTGCACTGATGTTCTGCAAATGTGGCAGCCAGAGAACATACTCATATCAGCAGAGGGAAACCTTAAACTGTGCGA  
CTTCGGCAGTGCAAAGATGTTCCGACCATTACCAAATGGATTTTTCCAATCTGAAAGGTGCTGATTATCCGAAGCTTGTGTTTGGATTCTAT  
TACGAGTAGTACGAAGCTTCTCCATGCTGAAAGGTTCAATGCGAGATGAGTTCTTGTGATAAAAAGCCCTAATTACCTGTGACAGAAGA  
TTCTTCCGCTTTCGTTGGCACAGCAGAATATGTGTCACCAGAAGTTCTTCACGGCAAATCAGCTAGCCATTCGTATGTTACAAAATTTCTGT  
CCTGCGAAGATTTGCTTGAATATGTTTTCTTTACATGAGTTACATTTAAGATATTGTTAGCAATTTTCATGTGCAGTTTGCTTTCAAGTTG  
CGGATTTCTGCATCTTCTTATTGTGCTATATTTCTTGTGTTTGCATCAGTGTGCTGACTTGTGGGCATTGGGTTGCACTATATACCAAATGTTAGA  
AGGCAGACCCCGTTCAAAGCTGCGACAGAATATTTGACCTTTCAGAAAGTGATGGCACGAGAGCTTTCATTCCATCGCATTTTAGTCCC  
GAAGCCAAAGACCTGGTAGACAGTCTGCTGTAATAATTTCTGTTCTACTATTCATTTCCGGTCCATTTTTTATACGTCGCTGTTTGTCTAT  
GAAAGGAGGTAGAATTTGAATTTCAAGATGTATTTTGTGTTACTATTTTAGTTTTAGTTTTAGTTTTTACTAAGTTTATACGATTAGCTGTC  
CGCTAATGGAAGTGGCTTTTAACTGCAAGATTTGAAACCTAATGAGAGACTGGGAGTTCAAGGCTATGATGACATCAAGAACCATCCG  
TTCTTTAAAGGATTTGATTGGTCCAGGCTCAGGAAAATGGCTACTCCGAAGCTGCTAAAGGTCCGGAACAAGTACTGATTCTATTGTGA  
TGTTAACAATTTACTCCTTGTCTAACAATCTATACCTGCGTATCTTCATTGTGTTTCAAGATGATCACTGAAATGAATGTGAATGGAAACA  
AAAGCGAATCTGTTTTTTTGCATTTTACGATACTATTCAGTGGTCTTACGTTGCGATTACTTGGCAGGATCCCAATACTGAAAGTTTGG  
TGAAGAAGAAAATGGCAAGCAGGATAAATTGATGGTTTGGATGCATTTGTATACGACGTATGAATTATCAGTAGACTCACATGTAGAATC  
TGCTGTTGAACAAGTTTGGCTCCCTGCCTCTCGCTCTTAATGTGTTTTCTCGATAGAAATTCATGTTAAGTTGCTAACTGATGGAAGGCC  
CGATCCATTGCAGCATAAATTACCAGTTGGAGATAAATGTATTTTTTGAACCTCGATCTCTTTTATGAACATCTTATAAAATTCCTTC  
AGTCCATAATGTGGTCTGATTCCCATAT

**B** ATGGCCATGGATGGGACCTCCCCCGTGTGCGCTGAGCCGAATCAGTCCAAACCTCTCGACCCCAAACAACCTCGTCATGCGTGCACCCGAGA  
TGGATTTTACTTCCAACGATTTCTTGTGTTGCCAAGTTGCTCGGCCTGGGGTCTATTCAAAGGTGACAAAAGCGAAGAGGAAGAACACGGG  
CGAAATATATGCGTTGAAGATAATGAACAAGAAGCACATAATTCGTGAGAATAAGGTTAAGTTTGTGAAAATGGAGCGCATGATACTCGAC  
CAGCTCGACCATCCGGGCGTAGTGAAGCTATGCTTTACATTCCAGGATGTCCACTCTTTGTACATGGGGCTTGAATGTTGCACTGGTGGAG  
AACTTTTCGAGCAGATAAGAAGGAGTAAACGGATGTCCGAAGAAGATACTCGATTCTATACAGCGGAGATTGTTGATATTCTGGAGTACAT  
TCATTCCCAAGGCATTGTCCACCGTGTCTTAAAGCCAGAGAACATACTCATATCAGCAGAGGGAAACCTTAAACTGTGCGACTTCGGCAGT  
GCAAAGATGTTCCGACCATTACCAAATGGATTTTTCCAATCTGAAAGAAGATTTCTCCGCCTTCGTTGGCACAGCAGAATATGTGTCAC  
CAGAAGTTCTTCACGGCAAATCAGCTAGCCATTCTGTGCTGACTTGTGGGCATTGGGTTGCACTATATACCAAATGTTAGAAGGCAGACCC  
GTTCAAAGCTGCGACAGAATATTTGACCTTTCAGAAAGTGATGGCACGAGAGCTTTCATTCCATCGCATTTTAGTCCCAGGAAAGAC  
CTGGTAGACAGTCTGCTGAATTTGAAACCTAATGAGAGACTGGGAGTTCAAGGCTATGATGACATCAAGAACCATCCGTTCTTTAAAGGAT  
TTGATTGGTCCAGGCTCAGGAAAATGGCTACTCCGAAGCTGCTAAAGGATCCCAATACTGAAAGTTTGGATGAAGAAGAAAATGGCAAGC  
AGGATAAATTGATGGTTTGGATGCATTTGTATACGACGTATGAATTATCAGTAGACTCACATGTAGAATC

**C** MAMDGTSVPSPEPNQSKPLDPKQLVMRAPQMDFTSNDFLFAKLLGLGYSKVTKAKRKNTGEIYALIMNKKHIIRENKVKFVKMERMILD  
QLDHPGVVVKLCFTFDVHSLYMGLECCGTGELFEQIRRSKRMSEEDTRFYTAIEVDILEYIHSQGIIVHRDLKPENILISAEGNLKLCDFGS  
AKMFRPLPNGFFQSEEDSSAFVGTAEYVSPVLHGKSASHSVLDLWALGCTIYQMLEGRPPFKAATEYLTFOKVMARELSIPSHFSPEAKD  
LVDSLNLKPNERLGVQGYDDIKNHPFFKGFWDWSRLRKMATPKLLKDPNTESLDEEEKWQAGIIDGLDAFVYDV

**Supplemental Figure S2.** *PpPDK1* genomic DNA, cDNA, and protein sequences. **A**, *PpPDK1* genomic DNA sequence of 3941 nt, with 5' and 3' UTRs shown in blue text, exons in black text, and introns in red text. **B**, *PpPDK1* coding sequence of 1044 nt. The nucleotide at the 3' end of each exon is in red text. **C**, *PpPDK1* protein sequence of 347 amino acids. K67 is highlighted in green and K71, I75, Q106, and L111 are highlighted in yellow.

# Supplemental Figure S3

Nelson Dittrich & Devarenne

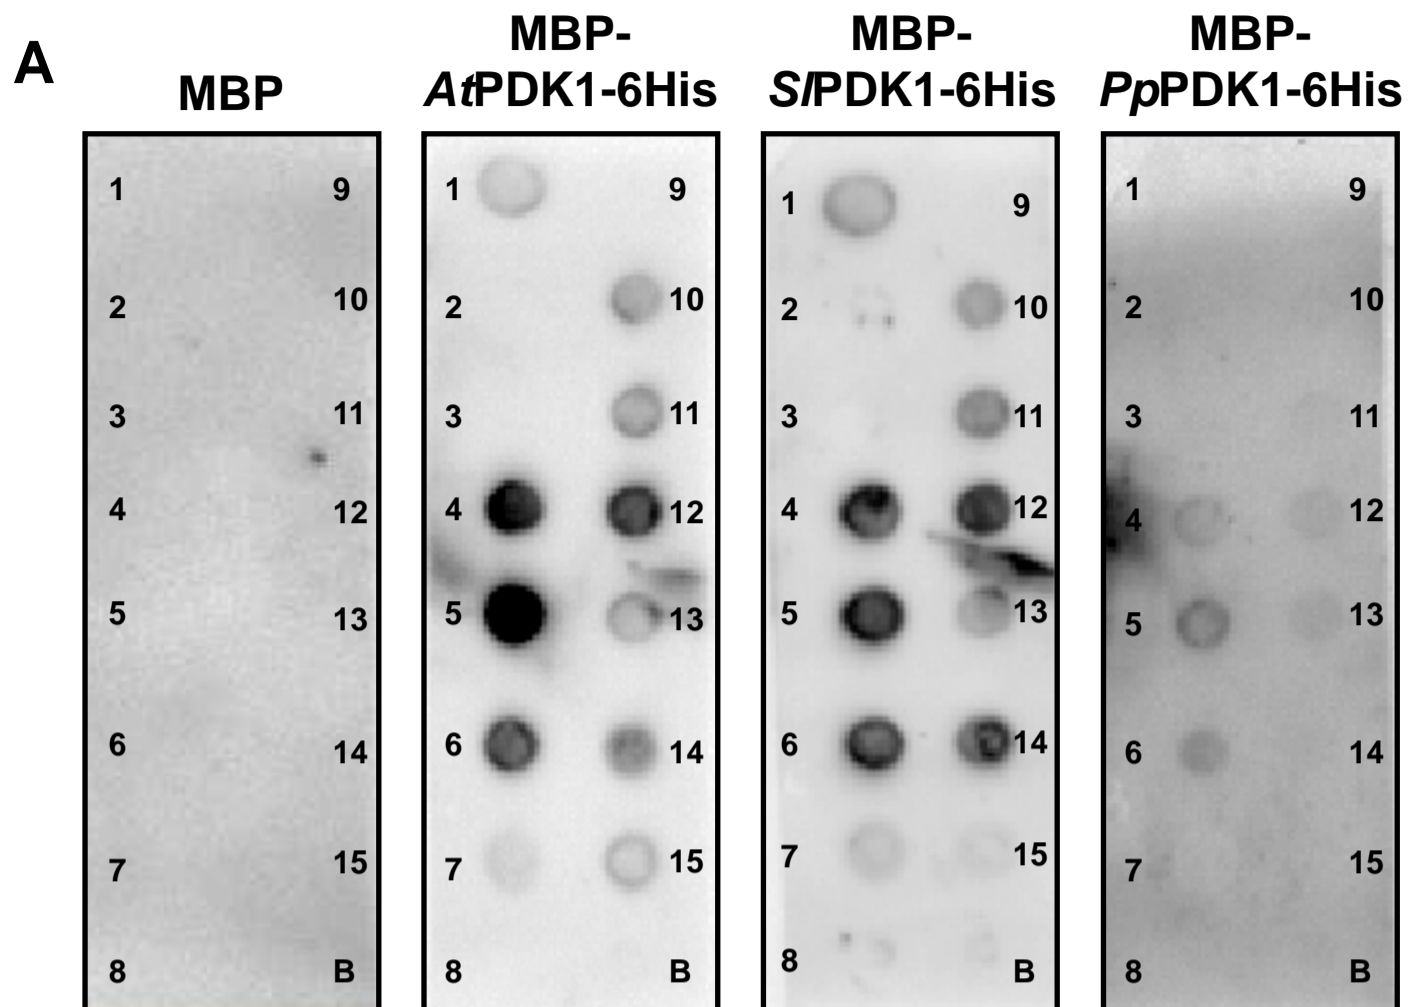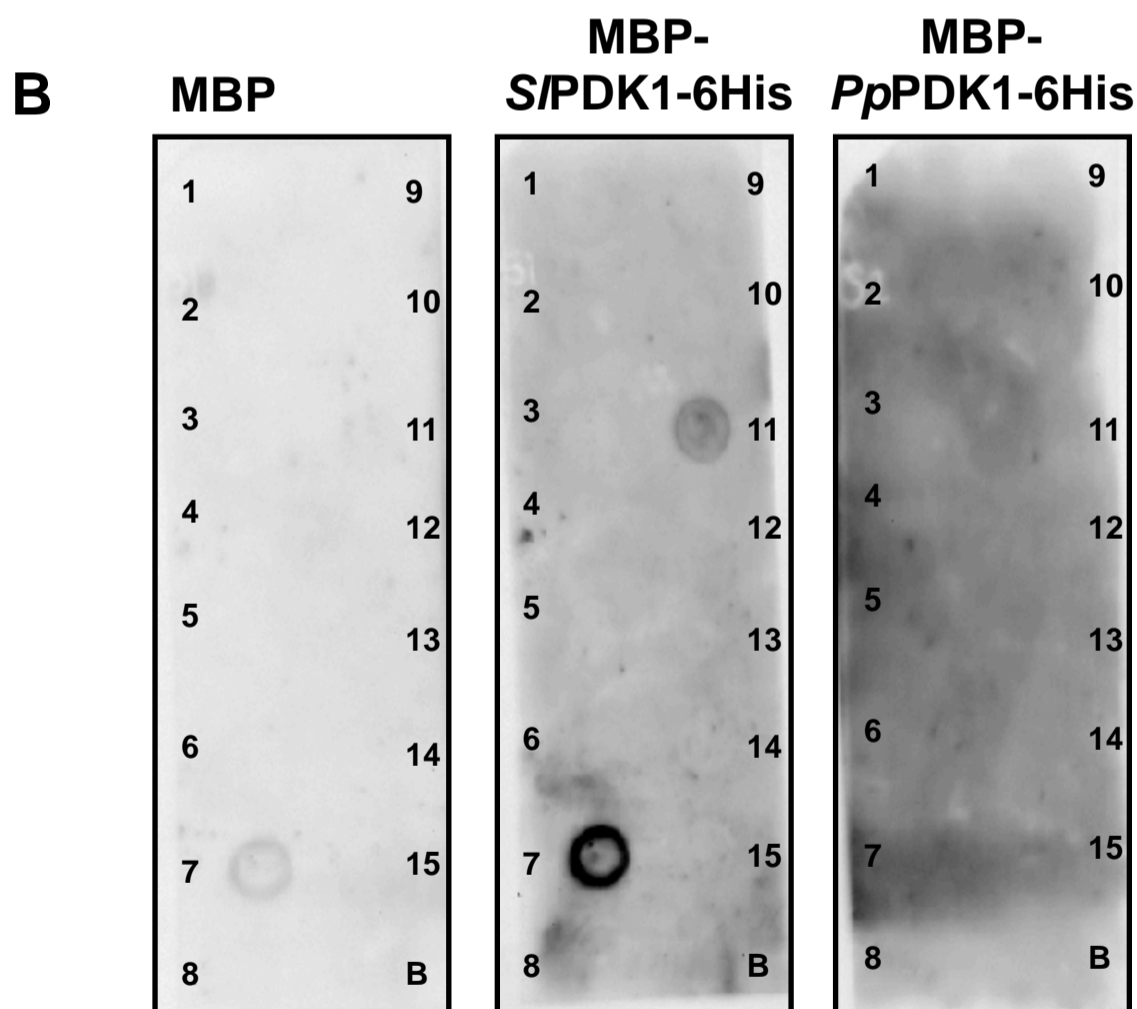

**Supplemental Figure S3.** *Pp*PDK1 does not strongly bind phospholipids or sphingolipids. A, Five  $\mu$ g purified MBP, MBP-*At*PDK1-6His, MBP-*S*/PDK1-6His, or MBP-*Pp*PDK1-6His was incubated with a membrane pre-spotted with 15 common lipids and a solvent blank, and analyzed by  $\alpha$ -MBP western blot. Numbers indicate the lipids spotted: 1, lysophosphatidic acid; 2, lysophosphocholine; 3, PtdIns; 4, PtdIns(3)P; 5, PtdIns(4)P; 6, PtdIns(5)P; 7, phosphatidylethanolamine; 8, phosphatidylcholine; 9, sphingosine-1-phosphate; 10, PtdIns(3,4)P<sub>2</sub>; 11, PtdIns(3,5)P<sub>2</sub>; 12, PtdIns(4,5)P<sub>2</sub>; 13, PtdIns(3,4,5)P<sub>3</sub>; 14, phosphatidic acid; 15, phosphatidylserine; B, 2 methanol:1chloroform:0.8 water solvent blank. B, Five  $\mu$ g purified MBP, MBP-*S*/PDK1-6His, or MBP-*Pp*PDK1-6His was incubated with a membrane pre-spotted with 15 common lipids and sphingolipids and a solvent blank, and analyzed by  $\alpha$ -MBP western blot. Numbers indicate the lipids spotted: 1, sphingosine; 2, sphingosine-1-phosphate; 3, phytosphingosine; 4, ceramide; 5, sphingomyelin; 6, sphingosyl-phosphatidylcholine; 7, lysophosphatidic acid; 8, myriocin; 9, monosialoganglioside-GM1; 10, disialoganglioside-GD3; 11, 3-sulfogalactosylceramide; 12, psychosine; 13, cholesterol; 14, lysophosphocholine; 15, phosphatidylcholine; B, solvent blank.

# Supplemental Figure S4

Nelson Dittrich & Devarenne

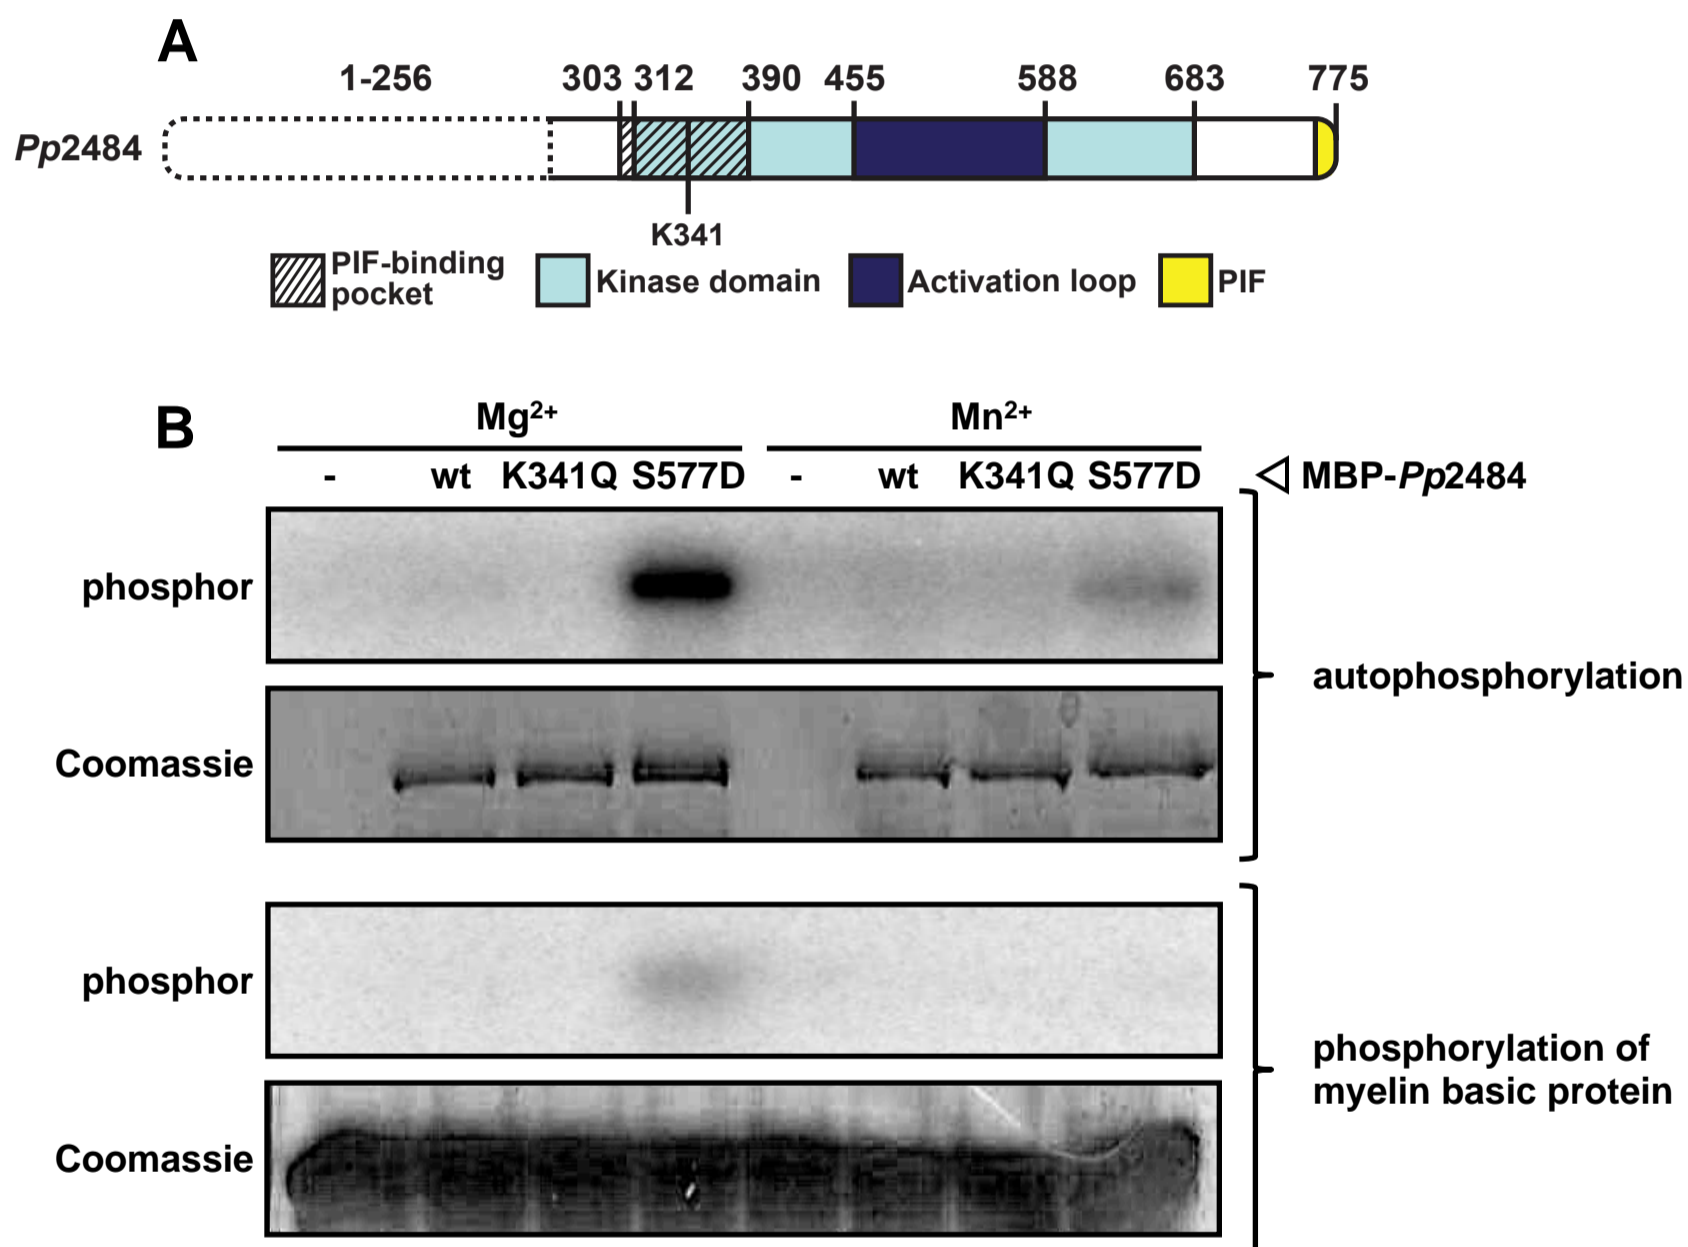

**Supplemental Figure S4.** Characterization of the kinase activity for the *P. patens* AGC kinase *Pp2484*. A, Diagram showing the protein features of *Pp2484*. B, *Pp2484* kinase activity is consistent with an AGC kinase that is activated by PDK1 phosphorylation in the conserved activation loop serine. Wild-type (wt), kinase-inactive (K341Q), and kinase-active (S577D) MBP-*Pp2484* were incubated with myelin basic protein in an *in vitro* kinase assay in the presence of either  $Mg^{2+}$  or  $Mn^{2+}$ .

# Supplemental Figure S5

Nelson Dittrich & Devarenne

## A

*Pp*PDK1 (30) -QMDFTSND**F**LF~~AKLLGLGSYSKVTKAKRKNTGEIYAL~~**K**IMN**K**KHI**I**RENKVKFVKMER**R**MILDQLDHPGVVKLC**F****T****F**QDVHS--LYMGL**E** (116)  
*Sl*PDK1 (40) -QENFTIQD**F**ELGKIYGVGSYSKVVR~~AKKKDTANVYAL~~**K**IMD**K**KFI**T**KENKTAYVKLE**R**IVLDQLDHPGVVRL**F****T****F**QDTFS--LYMA**L**E (126)  
*Hs*PDK1 (73) QPRKKRPED**F**KFGKILGEGSFSTVVLARELATSREYAI**K**ILE**K**RHI**I**KENKVPYVTRE**R**DVMSRLDHPFFVKLY**F****T****F**QDDEK--LYFGL**S** (160)  
*Adi3* (299) RDGILGMSH**F**KLLKRLGCGDIGSVYLSELSGTRCYFAM**K**VMD**K**AS**L**ASRKKLTRAQTE**R**EILQLLDHPFLPTLY**T**H**F**E**T**DRF**S**CLVM--E (386)

**ATP coordinating lysine**

**PIF-binding pocket residues mutated in *Pp*PDK1**

**PIF-binding pocket residues not mutated in *Pp*PDK1**

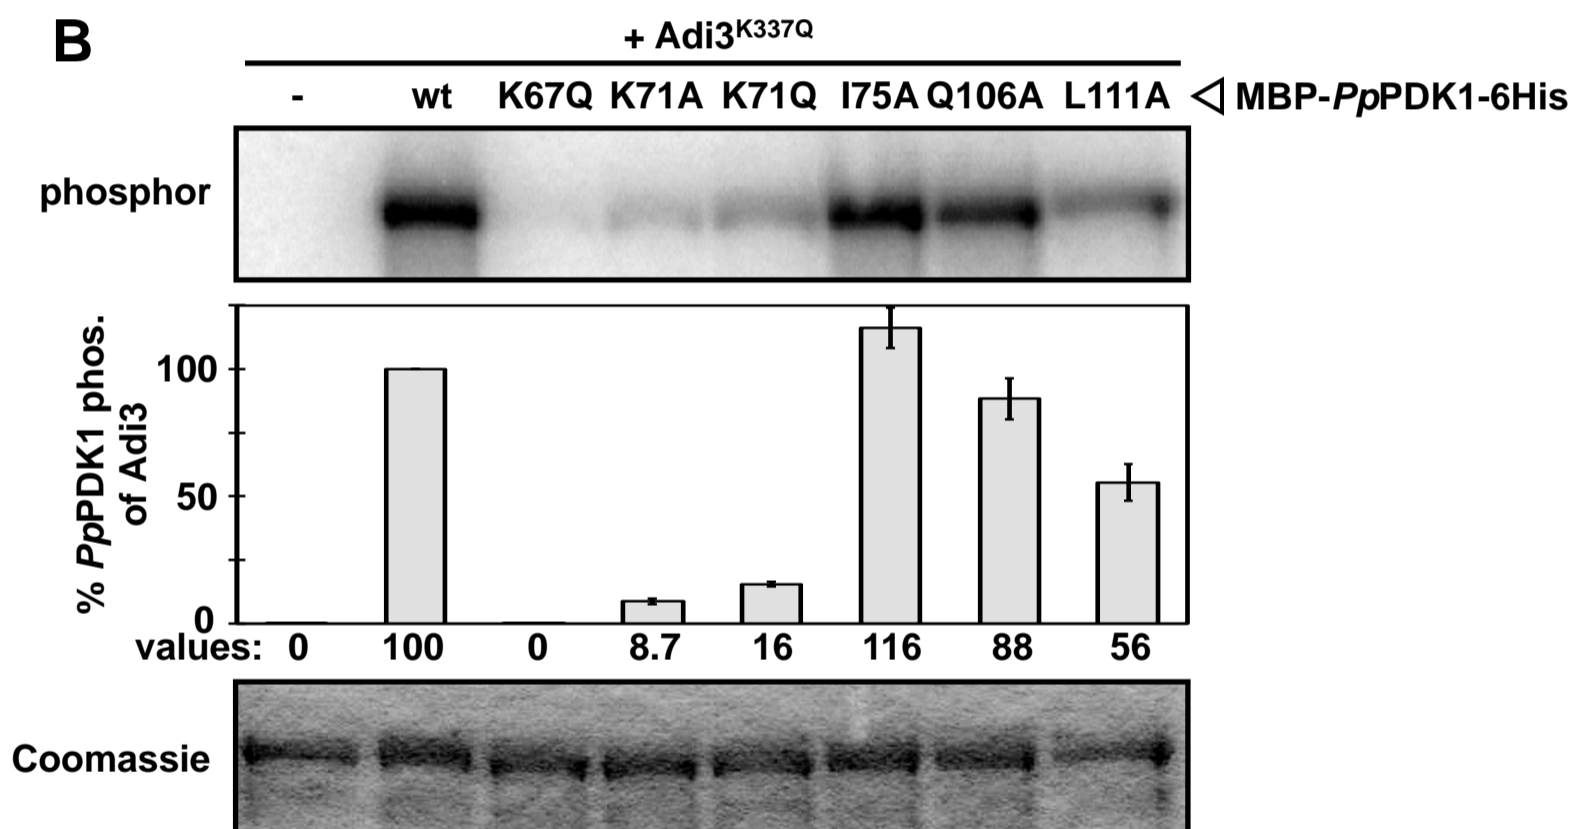

**Supplemental Figure S5.** Phosphorylation of *Adi3* by *Pp*PDK1 PIF-binding pocket mutants. A, Alignment of the PIF-binding pockets of PDK1 proteins from *P. patens* (*Pp*), tomato (*Le*), and human (*Hs*), and *Adi3* (adapted from Devarenne et al. 2006). Residues that Bind PIF residues is based on the *Hs*PDK1 PIF-binding pocket (Frodin et al., 2002). B, Mutation of *Pp*PDK1 PIF-binding pocket residues reduces phosphorylation of *Adi3*. Values are reported as the percentage of wt *Pp*PDK1 phosphorylation of *Adi3* and are the mean of three independent experiments. Error bars indicate standard error.

# Supplemental Figure S6

Nelson Dittrich & Devarenne

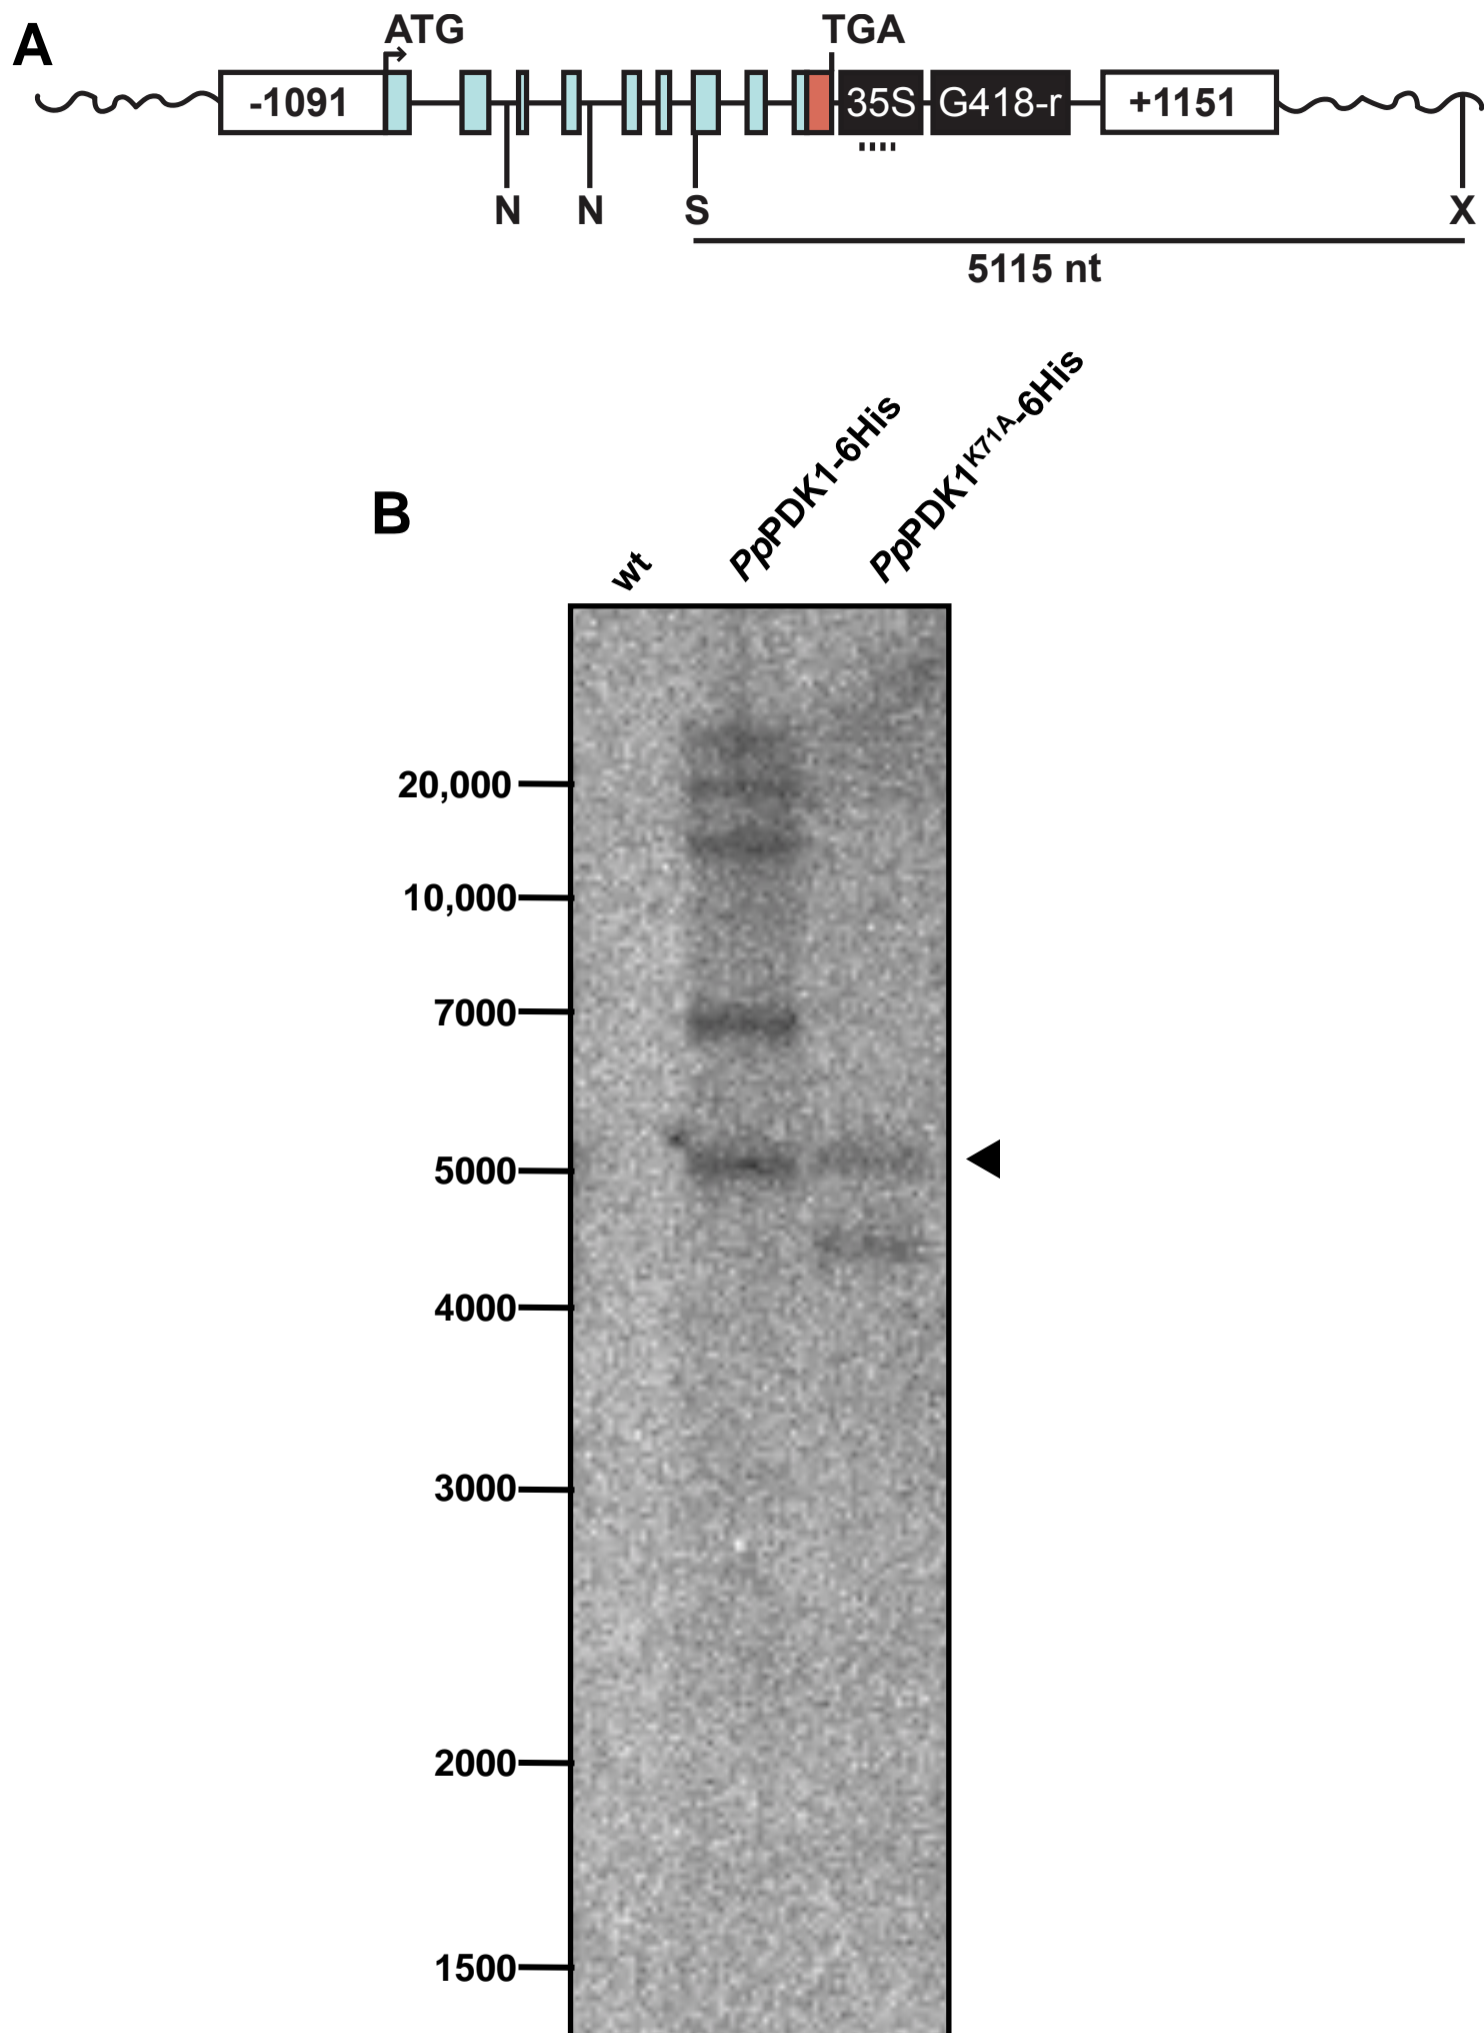

**Figure S6.** Southern blot analysis of *PpPDK1-6His* and *PpPDK1<sup>K71A</sup>-6His* transformed moss. A, The expected size of fragment detected by a probe based in the 35S promoter is depicted as a solid line below the figure. The location of the probe used in (B) is indicated by a dashed line. *NdeI*, *Sall*, and *XbaI* cut sites are indicated by N, S, and X respectively. B, Southern blot analysis of genomic DNA digested with *NdeI*, *Sall*, and *XbaI* from transformants confirms that the *PpPDK1-6His* constructs were integrated into the correct location in the genome, as indicated by the black triangle. Additional integration events, probably into the same genomic locus, also occurred in each transformant. Wild-type *P. patens* genomic DNA was used as a negative control.

# Supplemental Figure S7

Nelson Dittrich & Devarenne

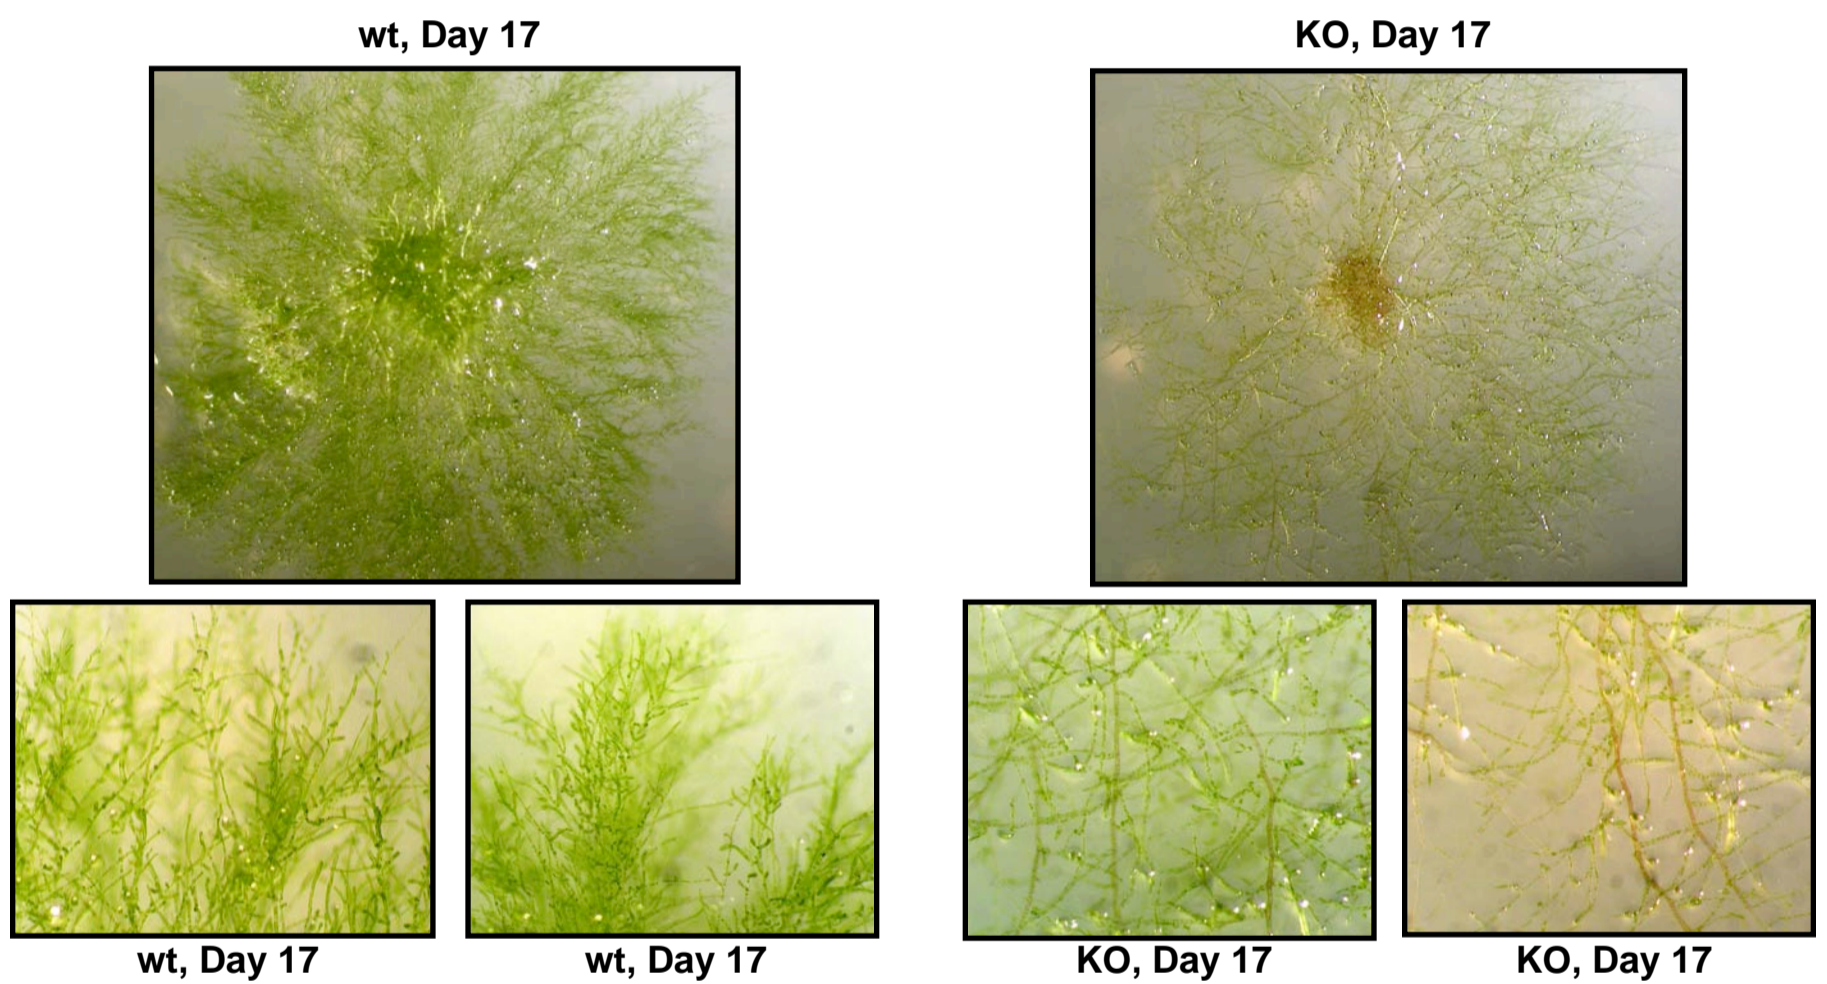

**Figure S7.** Protonema growth of wild-type and the *pdk1* knockout line at day 17. A, Moss were plated on BCD plates, grown for 17 days, and pictures taken. Pictures of the whole moss colony and close-ups of protonema from two different regions of reach moss colony are shown.



# Supplemental Figure S8

Nelson Dittrich & Devarenne

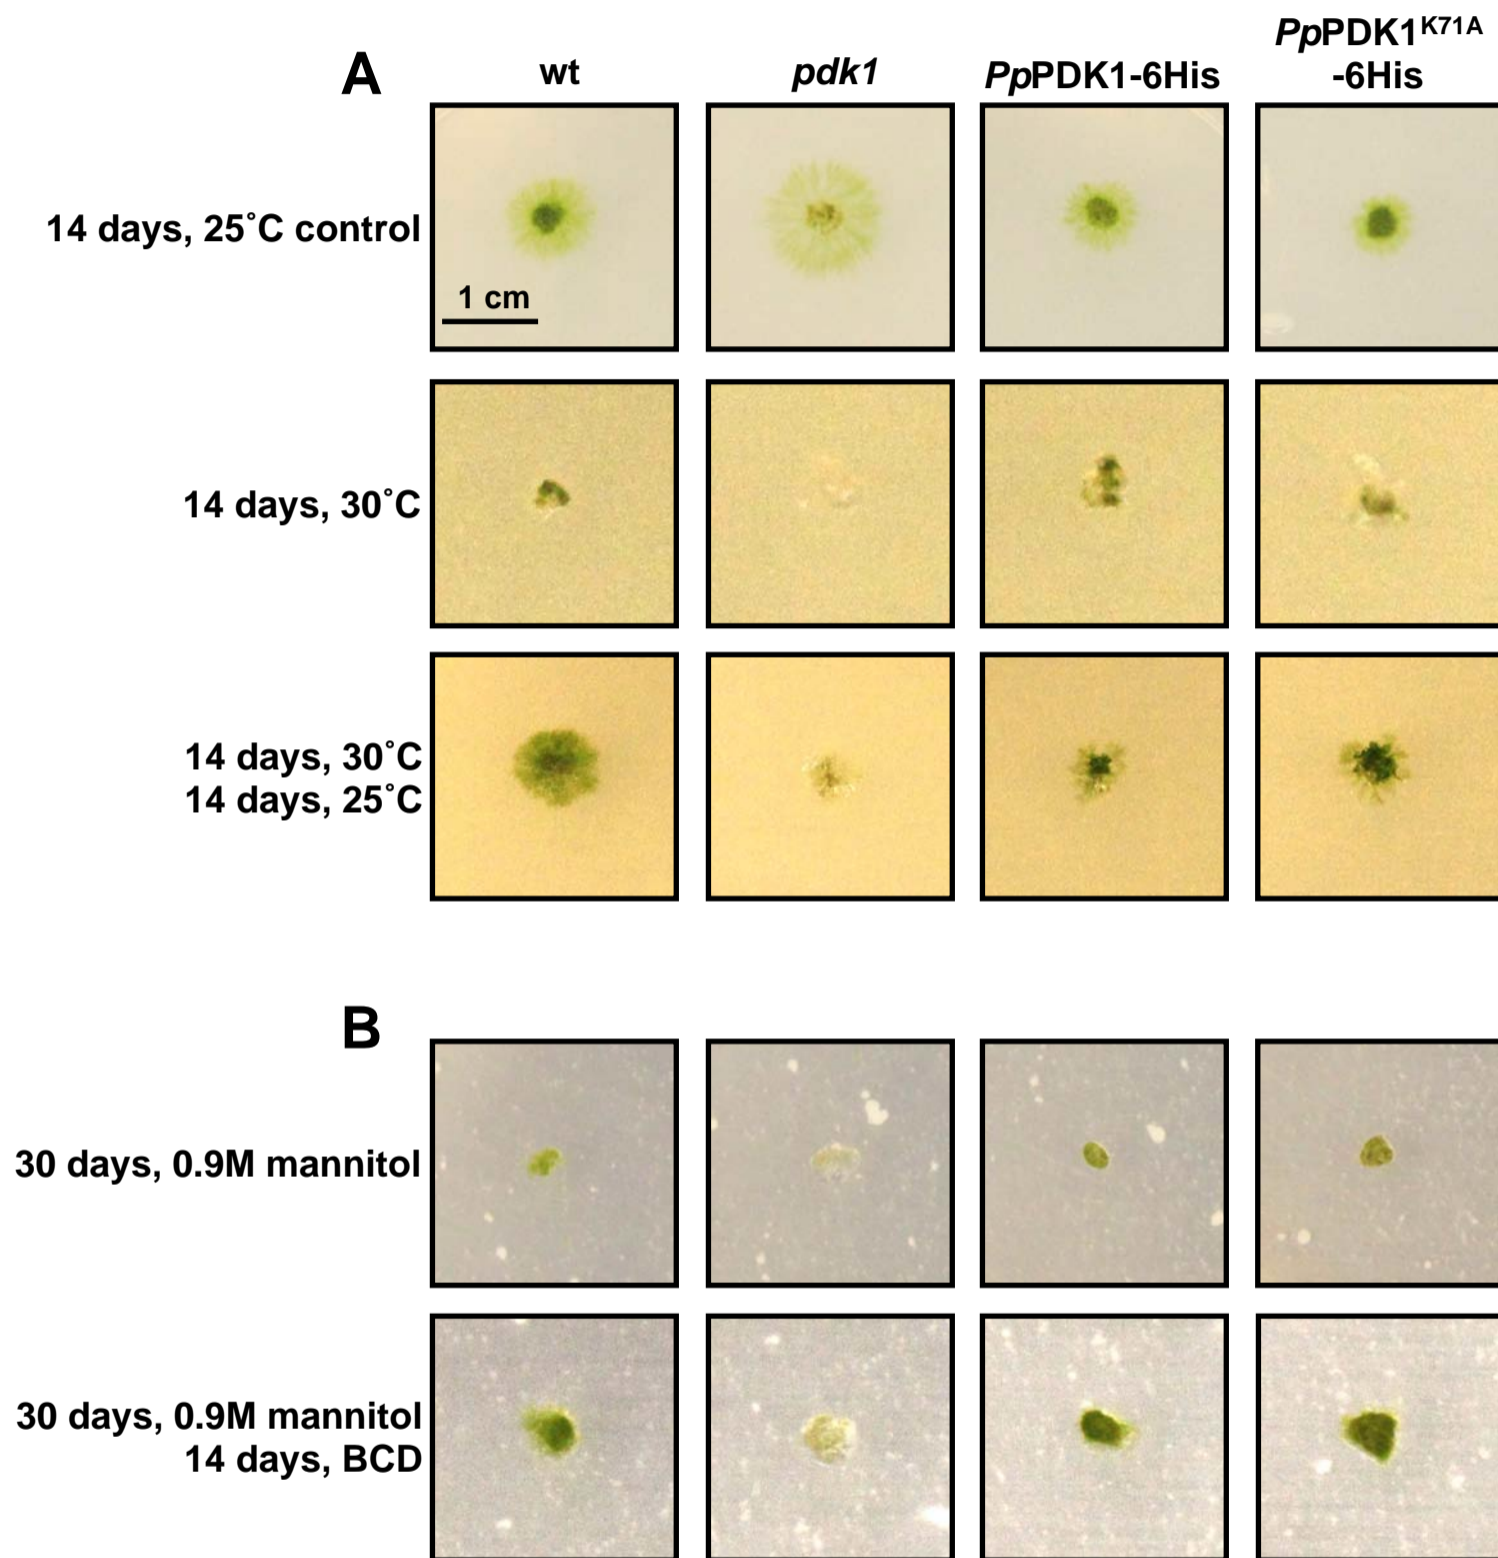

**Figure S8.** Stress treatment of moss lines. A, Wild-type, *pdk1* knockout, and gene replacement lines were plated on BCD plates, incubated at 30°C for 14 days, and then moved to 25°C for 14 days. B, Wild-type, KO, and gene replacement lines were plated on BCD plates containing 0.9M mannitol, grown for 30 days, moved to BCD plates without mannitol, and grown for 14 days.

# Supplemental Figure S9

Nelson Dittrich & Devarenne

*E.siliculosus* -----MRKHTAALLEVKLHEAGDAVEALRRYSSALSHTPDDHLLHSNR  
*C.merolae* -----  
*O.lucimarinus* -----MAEDGDDPGLVSFDELASVGTMRADAPRGSSPAANEEDSFGSATS  
*O.tauri* MATATATATEDGLVNF DALATMESVRERRGRDLRIEKLREEDENSERSERSAEEGSGPGT  
*O.sativa* -----  
*S.bicolor* -----  
*Z.mays1* -----  
*Z.mays2* -----  
*A.thaliana1* -----  
*A.thaliana2* -----  
*P.trichocarpa1* -----  
*P.trichocarpa2* -----  
*R.communis* -----  
*G.max1* -----  
*G.max2* -----  
*V.vinifera* -----  
*S.lycopersicum1* -----  
*S.lycopersicum2* -----  
*P.patens* -----  
*S.moellendorffii* -----  
*C.hlorella* -----  
*C.reinhardtii* -----  
*V.carteri* -----

*E.siliculosus* AMALAKLGRWSESEKSAKAVEASPDFAKGYLRLAKAQLEQAKNAEAVTACDEGLAAERR  
*C.merolae* -----MMSTWRRERR  
*O.lucimarinus* EGQASPAPTMMRSVLTRKPSVAALKAMLMSEERDEEGAGEGSETDEDEGVCSLSEFAMVLN  
*O.tauri* PTEAAPMRSVLTRKPSVAALKLFSSMDVNESEAESEKMDAEEGDEDVCSLSEFAMVLNVA  
*O.sativa* -----  
*S.bicolor* -----  
*Z.mays1* -----  
*Z.mays2* -----  
*A.thaliana1* -----  
*A.thaliana2* -----  
*P.trichocarpa1* -----  
*P.trichocarpa2* -----  
*R.communis* -----  
*G.max1* -----  
*G.max2* -----  
*V.vinifera* -----  
*S.lycopersicum1* -----  
*S.lycopersicum2* -----  
*P.patens* -----  
*S.moellendorffii* -----  
*C.hlorella* -----  
*C.reinhardtii* -----  
*V.carteri* -----

*E.siliculosus* SSLPPSTPVAVAAAGGGGGDGGAPAVAVSKTVRELEMMATAALERLRAQEGAGSRRQSGA  
*C.merolae* TPSWAVDESWFAELERGIKGGCAAGLPVDTSAKPEPVVCFEDSRDESEKETDQMLPHQPP  
*O.lucimarinus* AAAWDDASV GALGVEVIVKQLELLRGGIAP EASLSSMLGFDLAEDLSVRANSAGMVSVGA  
*O.tauri* AWVRDDKLAGQLNVDVIVKQLELLRGT VGTNSSL SGVLGFDVHRDLSVRADTAGFV SIGS  
*O.sativa* -----MAVGGDDD-MERDFAARLRLA--  
*S.bicolor* -----MAVGGDDDSMERDFAARLRLAH-  
*Z.mays1* -----MERDFAARLRLAH-  
*Z.mays2* -----MAVGGDDDSMERDFAARLRLAH-  
*A.thaliana1* -----MLA-----MEKEFDSKLV LQG-  
*A.thaliana2* -----MLT-----MDKEFDSKLT LQG-  
*P.trichocarpa1* -----MLE-----MEREFDSKLR IQS-  
*P.trichocarpa2* -----MSEHSPSLKCHI-  
*R.communis* -----MLA-----MEKDFDSKLR IQSS-  
*G.max1* -----MLE-----MEKDFDSKLR IQG-  
*G.max2* -----MLE-----TEKDFDSKLR IQG-  
*V.vinifera* -----  
*S.lycopersicum1* -----MLALVGGEGDMEQEFDAKLKIQN-  
*S.lycopersicum2* -----MEQELDSKLR IEN-  
*P.patens* -----MAMDGTSPVSP-  
*S.moellendorffii* -----  
*C.hlorella* -----  
*C.reinhardtii* -----  
*V.carteri* -----

# Supplemental Figure S9 contd.

Nelson Dittrich & Devarenne

|                          |                                                               |
|--------------------------|---------------------------------------------------------------|
| <i>E. siliculosus</i>    | SSAGSGSSSRDSSSSEAAAGRRKRSMSSSGTAGAGGVATGVGSG-----             |
| <i>C. merolae</i>        | VPEVSSKTSPPVADSHSWHT-----                                     |
| <i>O. lucimarinus</i>    | IGNVLYRGLSRSRVATLSSDRERFEDILDRRAVKNIKVLGGGDEDAIITSEDLKAKLD    |
| <i>O. tauri</i>          | IANVLYRGMARARSMADMSDDLDAFENLLYKRAVKSIISTVLSSGNDDGIVTYVDLAKALK |
| <i>O. sativa</i>         | -----PSPASPNAAA-----                                          |
| <i>S. bicolor</i>        | -----SPSPASPAAAA-----                                         |
| <i>Z. mays1</i>          | -----SPSPATPAAAA-----                                         |
| <i>Z. mays2</i>          | -----SPSPATPAAAA-----                                         |
| <i>A. thaliana1</i>      | -----NSSN-----                                                |
| <i>A. thaliana2</i>      | -----NSSN-----                                                |
| <i>P. trichocarpa1</i>   | -----GDHPSSSSNNN-----                                         |
| <i>P. trichocarpa2</i>   | -----                                                         |
| <i>R. communis</i>       | NNSSSSSSSISSNHNNNNNNN-----                                    |
| <i>G. max1</i>           | -----NSSSSNG-----                                             |
| <i>G. max2</i>           | -----NSSSSNG-----                                             |
| <i>V. vinifera</i>       | -----                                                         |
| <i>S. lycopersicum1</i>  | -----N-----                                                   |
| <i>S. lycopersicum2</i>  | -----N-----                                                   |
| <i>P. patens</i>         | -----EPN-----                                                 |
| <i>S. moellendorffii</i> | -----MAAGEEECAPST-----                                        |
| <i>C. hlorella</i>       | -----                                                         |
| <i>C. reinhardtii</i>    | -----MASE-----                                                |
| <i>V. carteri</i>        | -----MAE-----                                                 |

|                          |                                                              |
|--------------------------|--------------------------------------------------------------|
| <i>E. siliculosus</i>    | -----GG-----                                                 |
| <i>C. merolae</i>        | -----DG-----                                                 |
| <i>O. lucimarinus</i>    | YYGVRSSMTDIISIMTQADIESTGVVKVGDLSRLLARELEQLRGLLDE-----        |
| <i>O. tauri</i>          | YFGVKSSMTDIISMMSQADIEGSGVVKVSDLSRLLARELGQLRQLLNSKTEGSTNSKTRI |
| <i>O. sativa</i>         | -----GG-----                                                 |
| <i>S. bicolor</i>        | -----SS-----                                                 |
| <i>Z. mays1</i>          | -----SS-----                                                 |
| <i>Z. mays2</i>          | -----SS-----                                                 |
| <i>A. thaliana1</i>      | -----GA-----                                                 |
| <i>A. thaliana2</i>      | -----GE-----                                                 |
| <i>P. trichocarpa1</i>   | -----NG-----                                                 |
| <i>P. trichocarpa2</i>   | -----                                                        |
| <i>R. communis</i>       | -----IG-----                                                 |
| <i>G. max1</i>           | -----AG-----                                                 |
| <i>G. max2</i>           | -----GG-----                                                 |
| <i>V. vinifera</i>       | -----MV-----                                                 |
| <i>S. lycopersicum1</i>  | -----SA-----                                                 |
| <i>S. lycopersicum2</i>  | -----LP-----                                                 |
| <i>P. patens</i>         | -----QS-----                                                 |
| <i>S. moellendorffii</i> | -----AS-----                                                 |
| <i>C. hlorella</i>       | -----                                                        |
| <i>C. reinhardtii</i>    | -----EG-----                                                 |
| <i>V. carteri</i>        | -----SQ-----                                                 |

|                          |                                                              |
|--------------------------|--------------------------------------------------------------|
| <i>E. siliculosus</i>    | -----                                                        |
| <i>C. merolae</i>        | -----                                                        |
| <i>O. lucimarinus</i>    | -----                                                        |
| <i>O. tauri</i>          | SLEFARDGNSRRTVRDCLLNGQAAYGILQRFPTARPSRKKPGRLKWEDEDIAAVCLFDRS |
| <i>O. sativa</i>         | -----                                                        |
| <i>S. bicolor</i>        | -----                                                        |
| <i>Z. mays1</i>          | -----                                                        |
| <i>Z. mays2</i>          | -----                                                        |
| <i>A. thaliana1</i>      | -----                                                        |
| <i>A. thaliana2</i>      | -----                                                        |
| <i>P. trichocarpa1</i>   | -----                                                        |
| <i>P. trichocarpa2</i>   | -----                                                        |
| <i>R. communis</i>       | -----                                                        |
| <i>G. max1</i>           | -----                                                        |
| <i>G. max2</i>           | -----                                                        |
| <i>V. vinifera</i>       | -----                                                        |
| <i>S. lycopersicum1</i>  | -----                                                        |
| <i>S. lycopersicum2</i>  | -----                                                        |
| <i>P. patens</i>         | -----                                                        |
| <i>S. moellendorffii</i> | -----                                                        |
| <i>C. hlorella</i>       | -----                                                        |
| <i>C. reinhardtii</i>    | -----                                                        |
| <i>V. carteri</i>        | -----                                                        |

# Supplemental Figure S9 contd.

Nelson Dittrich & Devarenne

```

E.siliculosus -----
C.merolae -----
O.lucimarinus -----
O.tauri GTMMIQEQGELVTLPTKLDYFTDVHRSKDTRTIVELPPKEPSEEDPPQGFARIFACCF
O.sativa -----
S.bicolor -----
Z.mays1 -----
Z.mays2 -----
A.thaliana1 -----
A.thaliana2 -----
P.trichocarpa1 -----
P.trichocarpa2 -----
R.communis -----
G.max1 -----
G.max2 -----
V.vinifera -----
S.lycopersicum1 -----
S.lycopersicum2 -----
P.patens -----
S.moellendorffii -----
C.hlorella -----
C.reinhardtii -----
V.carteri -----

```

```

E.siliculosus -----GGGKAVGEGSDPP-----KPS--
C.merolae -----ERNARRHFIALLP-----GVPPLELQGA-
O.lucimarinus -----KVDNSKSERFRVSLDIERDGAETSNSLLKGQATFG
O.tauri PKILCFTKFPSPQPVVAVSVNPPSRLGRSPGSAHAFVTARRLACRLAIERARTPPRTPPF-
O.sativa -----GGGGIAFRAP-----QEQF-
S.bicolor -----SPTAAGGIAFRAP-----QEQF-
Z.mays1 -----SPTAAGGIAFRAP-----QEQF-
Z.mays2 -----SPTAAGGIAFRAP-----QEQF-
A.thaliana1 -----NVRSKSFSAFKAP-----QENF-
A.thaliana2 -----TISRKSFSAFKAP-----QENF-
P.trichocarpa1 -----SVQRSKSFSAFRAP-----QENF-
P.trichocarpa2 -----
R.communis -----NVQRSKSFSAFRAP-----QENF-
G.max1 -----NVQRSKSFSAFRAP-----QENY-
G.max2 -----NVQRSKSFSAFRAP-----QENY-
V.vinifera -----ALLRSKSFSAFRAP-----QENF-
S.lycopersicum1 -----NTQRSKSFSAFRAP-----QENF-
S.lycopersicum2 -----NPQRSKSFSAFRAP-----QENF-
P.patens -----KPLDPKQLVMRAP-----QMDF-
S.moellendorffii -----SCKPGSKLTFRAP-----QQPY-
C.hlorella -----LRDREQQEGYRAP-----RVTL-
C.reinhardtii -----LEDREHQEGYRAP-----RVAL-
V.carteri -----

```

```

E.siliculosus -----IKDFKVVKELGTGNFSTI--VKAHRRTGKPF
C.merolae -----SRADFKATELIGEGACSRV--LRATYLP TGREY
O.lucimarinus VLQRFPTARKDRQKPGRLLWAKDDEMCAMRDFVTVDTIGEGSYSSVREVFLANKPTER-Y
O.tauri -----EISDFVTVDVIGEGSYSDVREVFLSSRPSEY-
O.sativa -----TVGDFELGKIYGVSYSKV--VRAKKKDTGNVY
S.bicolor -----TADDFVLGKIYGVSYSKV--VRATKKDTGRVY
Z.mays1 -----TADDFVLGKIYGVSYSKV--VRAKKKDTGRVY
Z.mays2 -----TADDFVLGKIYGVSYSKV--VRAKKKDTGRVY
A.thaliana1 -----TSHDFEFGKIYGVSYSKV--VRAKKKETGTVY
A.thaliana2 -----TYHDFELGKIYGVSYSKV--VRAKKKDN GTVY
P.trichocarpa1 -----TIHDFELGKIYGVSYSKV--VRAKKKDTGTVY
P.trichocarpa2 -----V--VRAKKKDTGIVY
R.communis -----SIQDFELGKIYGVSYSKV--VRAKKKDTGMVY
G.max1 -----TIQDFELGKIYGVSYSKV--VRAKKKDTGIVY
G.max2 -----TIQDFELGKIYGVSYSKV--VRAKKKDTGTVY
V.vinifera -----TIQDFELGKIYGVSYSKV--VRAKKKDTGIVY
S.lycopersicum1 -----TIQDFELGKIYGVSYSKV--VRAKKKDTANVY
S.lycopersicum2 -----TIQDFELGKIYGVSYSKV--VRAKKKDTGNVY
P.patens -----TNDFLFAKLLGLGSYSKV--TKAKRKN TGEIY
S.moellendorffii -----TYQDFAYGRLLGMGSYSKV--VRAKKKDSGAEF
C.hlorella -----SLADFELLRRIGDGSYSHV--VLARHRATGRDY
C.reinhardtii -----TIKDFDVLGRIGDGSFSTV--FLARQKQSGKQY
V.carteri -----TIRDFHILGRIGDGSFSTV--FLAQKQTKGKQY

```

# Supplemental Figure S9 contd.

Nelson Dittrich & Devarenne

|                          |                                                               |
|--------------------------|---------------------------------------------------------------|
| <i>E. siliculosus</i>    | ALKMIEKAEVNRKRRHENYNEIYMEKRALTK--LSHPNIVRMHSTFQDYSTLYYLLDM    |
| <i>C. merolae</i>        | AVKVISKALAEQ-----NEQVLPRLTEQICLQVG-LGHPNIVQLKAILEDENFLYMVIEL  |
| <i>O. lucimarinus</i>    | ALKIMDKSHIVR-----EGKARYVATERALLAGRLADCCVAALRFTFQDTYSLYLGMEL   |
| <i>O. tauri</i>          | ALKVMDKAHIVR-----ESKSRYVATERTLLAGRLRECEHVARLMFTFQDTYSLYMGFEL  |
| <i>O. sativa</i>         | ALKIMDKKFITK-----ENKISYVKMERIVLDQ--LDHPGVIRLFFTFQDTYSLYMALES  |
| <i>S. bicolor</i>        | ALKIMDKKFITK-----ENKISYVKMERIVLDQ--LDHPGVIRLFFTFQDTYSLYMALES  |
| <i>Z. mays1</i>          | ALKIMDKKFITK-----ENKISYVKMERIVLDQ--LDHPGVIRLFFTFQDTYSLYMALES  |
| <i>Z. mays2</i>          | ALKIMDKKFITK-----ENKISYVKMERIVLDQ--LDHPGVIRLFFTFQDTYSLYMALES  |
| <i>A. thaliana1</i>      | ALKIMDKKFITK-----ENKTAYVKLERIVLDQ--LEHPGIKLYFTFQDTSSLYMALES   |
| <i>A. thaliana2</i>      | ALKIMDKKFITK-----ENKTAYVKLERIVLDQ--LEHPGIVKLFFTFQDTQSLYMALES  |
| <i>P. trichocarpa1</i>   | ALKIMDKKFITK-----ENKTAYVKLERIVLDQ--LDHPGIVRLFFTFQDNYSLYMALES  |
| <i>P. trichocarpa2</i>   | ALKIMDKKFITK-----ENKTAYVKLERIVLDQ--LDHPGIVRLYFTFQDNYSLYMALES  |
| <i>R. communis</i>       | ALKIMDKKFITK-----ENKTAYVKLERIVLDQ--LDHPGIVRLFFTFQDSFSLYMALES  |
| <i>G. max1</i>           | ALKIMDKKFITK-----ENKTAYVKLERIVLDQ--LDHPGIVRLYFTFQDSFSLYMALES  |
| <i>G. max2</i>           | ALKIMDKKFITK-----ENKTAYVKLERIVLDQ--LDHPGIVRLYFTFQDSFSLYMALES  |
| <i>V. vinifera</i>       | ALKIMDKKFITK-----ENKTAYVKLERIVLDQ--LDHPGIVRLFFTFQDTFSLYMALES  |
| <i>S. lycopersicum1</i>  | ALKIMDKKFITK-----ENKTAYVKLERIVLDQ--LDHPGVVRLFFTFQDTFSLYMALES  |
| <i>S. lycopersicum2</i>  | ALKIMDKKFITK-----ENKTAYVKLERIVLDQ--LDHPGIVRLFFTFQDTFSLYMALES  |
| <i>P. patens</i>         | ALKIMNKKHIIIR-----ENKVKFKMERMILDQ--LDHPGVVRLCFTFQDVHSLYMGLEC  |
| <i>S. moellendorffii</i> | ALKIMDKKHITK-----ENKVAYVKMERLILDH--LDHPGVVRLFFTFQDTHNLYMGLEC  |
| <i>C. hlorella</i>       | ALKVIDKQYIMR-----HRVVDYIRKERQILDA--LQYDGIKLYFTFQDAYSLYLGLEY   |
| <i>C. reinhardtii</i>    | AIKMMNKHLVMR-----NKMVEYIKNERFILDK--FDDAGIAKLHFTFQDPDNL YMGMEY |
| <i>V. carteri</i>        | AIKMMNKHLIMR-----NKVVEYIKNERFILDK--LDDAGIAKLHFTFQDPNNLYMGMEY  |

\*: \* : : \* . : \* . \* : : : \* \* : :

|                          |                                                              |
|--------------------------|--------------------------------------------------------------|
| <i>E. siliculosus</i>    | CDGGEVWKRLTVD-----DKVVG AHP-SLARFWLSEVV                      |
| <i>C. merolae</i>        | CPHGLDARLLARRRASET PPHSHRDRFQKREPNGAAPSGGNHVGALSLDAARFYFAEIV |
| <i>O. lucimarinus</i>    | CTGGDLYSQLKRS-----EGEVMTEEKAVFYVSEVT                         |
| <i>O. tauri</i>          | CPGGDLFWQLKRS-----EEGVMTEETKVVVFYVSEVL                       |
| <i>O. sativa</i>         | CEGGELFDQIVRK-----GRLSEDEARFYAAEIV                           |
| <i>S. bicolor</i>        | CEGGELFDQIVRK-----GRLSEDDARFYAAEIV                           |
| <i>Z. mays1</i>          | CEGGELFDQIVRK-----GRLSEDDARFYAAEIV                           |
| <i>Z. mays2</i>          | CEGGELFDQIVRK-----GRLSEDDARFYAAEIV                           |
| <i>A. thaliana1</i>      | CEGGELFDQITRK-----GRLSEDEARFYTAEVV                           |
| <i>A. thaliana2</i>      | CEGGELFDQITRK-----GRLSEDEARFYSAEVV                           |
| <i>P. trichocarpa1</i>   | CEGGELFDQITRK-----GRLSEDEACFYAAEVV                           |
| <i>P. trichocarpa2</i>   | CEGGELFDQITRK-----GRLSEDEARFYAAEVV                           |
| <i>R. communis</i>       | CEGGELFDQITRK-----GRLSEDEARFYAAEVV                           |
| <i>G. max1</i>           | CEGGELFDQITRK-----GRLSENEARFYAAEVI                           |
| <i>G. max2</i>           | CEGGELFDQITRK-----GRLSEDEARFYAAEVV                           |
| <i>V. vinifera</i>       | CEGGELFDQITRK-----GRLSENEARFYAAEVV                           |
| <i>S. lycopersicum1</i>  | CEGGELFDQITRK-----GRLSEDEARFYAAEVV                           |
| <i>S. lycopersicum2</i>  | CEGGELFDQITRK-----GRLSEDEARFYAAEVA                           |
| <i>P. patens</i>         | CTGGELFEQIRRS-----KRMSEEDTRFYTAEIV                           |
| <i>S. moellendorffii</i> | CHGGELFDQIRRK-----GRLSLEEARFYAAEIV                           |
| <i>C. hlorella</i>       | CPNGELYDQIRLQ-----GRLPEATAAAAYAGEVV                          |
| <i>C. reinhardtii</i>    | CAGGELYEQINKR-----GRLPLEAVRFYAAEVV                           |
| <i>V. carteri</i>        | CAGGELYEQIKRR-----GGLPLDAVRFYAAEVV                           |

\* \* : : : . : \* :

|                          |                                                                |
|--------------------------|----------------------------------------------------------------|
| <i>E. siliculosus</i>    | SAMEHMHRRLVHRDLKPENMMLTMGGHVKLVDFTGCK----DLLETDI----NG----     |
| <i>C. merolae</i>        | SAVDLIHKNGIVHRDLKPHNILIGNKGHC K LADFGVAAILGKTPDDELAGRSPRPQ---- |
| <i>O. lucimarinus</i>    | RAVQQCHARGIVHRDVKPENVLIDSTGHVKLCDFGSAL-DLQPVMTSVLTATAIEQAVKKD  |
| <i>O. tauri</i>          | VAVQDCHARGVVHRDVKPENVLIDASGHVKICDFGSAL----DLRHEVTSALTALA----   |
| <i>O. sativa</i>         | DILEYLHSLGLIHRDVKPENLLLTSDGHIKIADFGSVK----PTKDTPIKVLPNST----   |
| <i>S. bicolor</i>        | DILEYLHGVLGLIHRDVKPENLLLTSDGHIKIADFGSVK----PTRDTPIKVLPNST----  |
| <i>Z. mays1</i>          | DILEYLHGLGLIHRDVKPENLLLTSDGHIKIADFGSVK----PTRDTPIKVLPNST----   |
| <i>Z. mays2</i>          | DILEYLHGLGLIHRDVKPENLLLTSDGHIKIADFGSVK----PTRDTPIKVLPNST----   |
| <i>A. thaliana1</i>      | DALEYIHSMLIHRDIKPENLLLTSDGHIKIADFGSVK----PMQDSQITVLPNAA----    |
| <i>A. thaliana2</i>      | DALEYIHNMG LIHRDIKPENLLLTLDGHIKIADFGSVK----PMQDSQITVLPNAA----  |
| <i>P. trichocarpa1</i>   | DALEYIHSMLIHRDIKPENLLLTAEGHIKIADFGSVK----PMQDSCITVLPNAA----    |
| <i>P. trichocarpa2</i>   | DALEYIHSMLIHRDIKPENLLFAADGHIKIADFGSVK----PMQDSCITVLPNAA----    |
| <i>R. communis</i>       | DALEYIHGMGLIHRDIKPENLLLTADGHIKVADFGSVK----PMQDSRITVLPNAA----   |
| <i>G. max1</i>           | DALEYIHN LGVIHRDIKPENLLLTAEGHIKIADFGSVK----PMQDSQITVLPNAA----  |
| <i>G. max2</i>           | DALEYIHN LGVIHRDIKPENLLLTAEGHIKIADFGSVK----PMQDSQITVLPNAA----  |
| <i>V. vinifera</i>       | DALEYIHS LGLIHRDIKPENLLLTADGHIKIADFGSVK----PMQDSLITVLPNAA----  |
| <i>S. lycopersicum1</i>  | DALEYIHSMLIHRDIKPENLLLTSDGHIKIADFGSVK----PMQDSRITVLPNAA----    |
| <i>S. lycopersicum2</i>  | DSLEYIHSMLIHRDIKPENLLLTSDGRIKIADFGSVK----PMQDSRITVLPNAA----    |
| <i>P. patens</i>         | DILEYIHSQGIHRDLKPENILISAEGNLKLCDFGS AKM-FRPLPNG----FFQSE----   |
| <i>S. moellendorffii</i> | DVLEYIHGQGLIHRDLKPENLLLTADGHIKVADFGSAKV-TTPLQNG----LSDAQ----   |
| <i>C. hlorella</i>       | LMLRYLRQQGVVHRDLKPENLLLDGEGHLKLI DFGSAKQ-LAPEEEQA AHADAPPD---- |
| <i>C. reinhardtii</i>    | LILEYLRKAQVVHRDLKPENLLLSGDGHLKLI DFGSARAFFLPAAEK-----PP----    |
| <i>V. carteri</i>        | LILQYLRSAQVVHRDLKPENLLLSADGHLKLI DFGSARASFLPQAEK-----PP----    |

: . : : \* : \* \* : : \* . \* : \* \* :

# Supplemental Figure S9 contd.

Nelson Dittrich & Devarenne

|                          |                                                               |
|--------------------------|---------------------------------------------------------------|
| <i>E. siliculosus</i>    | ---GE-----FVGTAQYMSP-QAVAS-EE-QGREADLWALGCCVYQFLVGFT-PFHAPSP  |
| <i>C. merolae</i>        | ---DKHRYDSFVGTFAYLAP-EQLRRERPGGGFESDLWALGVVLYQMLCGGELPFRGETD  |
| <i>O. lucimarinus</i>    | AKHKKNRCASFVGTAEYVAP-EILEGCAE-TTTAVDLWSIGVMTFQLLTGRV-PFKDKTE  |
| <i>O. tauri</i>          | ---SEKRCASFVGTAEYVAP-EILDGCEE-TTTAVDLWSIGIMTFQLLTGRV-PFKGKTD  |
| <i>O. sativa</i>         | ---NE-RACTFVGTAAAYVPP-EVLNS-AP-PTFGNDLWALGCTLYQLLSGSS-PFKDASE |
| <i>S. bicolor</i>        | ---TE-RACTFVGTAAAYVPP-EVLNS-AP-ATFGNDLWALGCTLYQMLSGSS-PFKDASE |
| <i>Z. mays1</i>          | ---TE-RACTFVGTAAAYVPP-EVLNS-AP-ATFGNDLWALGCTLYQMLSGSS-PFKDASE |
| <i>Z. mays2</i>          | ---TE-RACTFVGTAAAYVPP-EVLNS-AP-ATFGNDLWALGCTLYQMLSGSS-PFKDASE |
| <i>A. thaliana1</i>      | ---SDDKACTFVGTAAAYVPP-EVLNS-SP-ATFGNDLWALGCTLYQMLSGTS-PFKDASE |
| <i>A. thaliana2</i>      | ---SDDKACTFVGTAAAYVPP-EVLNS-SP-ATFGNDLWALGCTLYQMLSGTS-PFKDASE |
| <i>P. trichocarpa1</i>   | ---SDDKACTFVGTAAAYVPP-EVLNS-SP-ATFGNDLWALGCTLYQMLSGTS-PFKDASE |
| <i>P. trichocarpa2</i>   | ---SDDKACTFVGTAAAYVPP-EVLNS-SP-ATFGNDLWALGCTLYQMLSGTS-PFKDASE |
| <i>R. communis</i>       | ---SDDKACTFVGTAAAYVPP-EVLNS-SP-ATFGNDLWALGCTLYQMLSGTS-PFKDASE |
| <i>G. max1</i>           | ---SDDKACTFVGTAAAYVPP-EVLNS-SP-ATFGNDLWALGCTLYQMLSGTS-PFKDASE |
| <i>G. max2</i>           | ---SDDKACTFVGTAAAYVPP-EVLNS-SP-ATFGNDLWALGCTLYQMLSGTS-PFKDASE |
| <i>V. vinifera</i>       | ---SDDKACTFVGTAAAYVPP-EVLNS-SP-ATFGNDLWALGCTLYQMLSGTS-PFKDASE |
| <i>S. lycopersicum1</i>  | ---SDDKACTFVGTAAAYVPP-EVLNS-SP-ATFGNDLWALGCTLYQMLSGTS-PFKDASE |
| <i>S. lycopersicum2</i>  | ---SDDKACTFVGTAAAYVPP-EVLNS-SP-ATFGNDLWALGCTLYQMLSGFS-PFKDASE |
| <i>P. patens</i>         | ---EED-SSAFVGTAEYVSP-EVLHG-KS-ASHSVDLWALGCTIYQMLEGRP-PFKAATE  |
| <i>S. moellendorffii</i> | ---ADDKSCTFVGTAEYVSP-EVLNG-HP-VTIGADLWALGCIYQMLEGRP-PFKGGSE   |
| <i>C. hlorella</i>       | ---AAAKAGGAAAKHAAAQPGSILNN-RA-VTCAADLWALGCVVYQMLAGRP-PFKSPSE  |
| <i>C. reinhardtii</i>    | ---GKQRATSFVGTAEYVSP-EVLLN-AP-LSYPADLWALGCMYQMIIVGRP-PFKAASE  |
| <i>V. carteri</i>        | ---GKNRATSFVGTAEYVSP-EVLLN-QP-LSYPADLWALGCLLYQMIIVGRP-PFKAASE |

... \* . : \*\*\*\*:\* :\*: \* \*\* . :

|                          |                                                              |
|--------------------------|--------------------------------------------------------------|
| <i>E. siliculosus</i>    | YLCFLRIKKGVF-RCPEV-LPDDA-TDLVKRLLRRNPSSRLG--AGPLSGTDPAPSPSGE |
| <i>C. merolae</i>        | YLLFQSILKDDV-AFPKSLPTSSGRDLVEKLLNKDPAQRIT-----               |
| <i>O. lucimarinus</i>    | YLTMQAVLKGKYVYPPEANVSSAA-KDFIDKLLVREPKKRLG----F-----         |
| <i>O. tauri</i>          | T-----RLSAN-ISESA-KDFIDSLLTRDPKRLG----Y-----                 |
| <i>O. sativa</i>         | WLIFQRIIARDL-KIPEY-FSDDA-RDLIDKLLDVPDPSKRPG--AGP-----        |
| <i>S. bicolor</i>        | WLIFQRIIARDL-KFPEY-FSAEA-RDLIDKLLDVPDPSKRPG--AGP-----        |
| <i>Z. mays1</i>          | WLIFQRIIARDL-KFPEY-FSAEA-RDLVDKLLDVPDPSKRPG--AGP-----        |
| <i>Z. mays2</i>          | WLIFQRIIARDL-KFPEY-FSAEA-RDLVDKLLDVPDPSKRPG--AGP-----        |
| <i>A. thaliana1</i>      | WLIFQRIIARDI-KFPNH-FSEAA-RDLIDRLLDTEPSRRPG--AGS-----         |
| <i>A. thaliana2</i>      | WLIFQRIIARDI-KFPNH-FSEAA-RDLIDRLLDTEPSRRPG--AGS-----         |
| <i>P. trichocarpa1</i>   | WLIFQRIIARDI-RFPDY-FSDEA-RDLIDHLLDIDPSRRPG--AGR-----         |
| <i>P. trichocarpa2</i>   | WLIFQRIIARDL-RFPDY-FSEEA-RDLIDHLLDIDPSRRPG--AGR-----         |
| <i>R. communis</i>       | WLIFQRIIARDI-RFPNY-FSEEA-RDIIDRLLDIDPSRRPG--AGP-----         |
| <i>G. max1</i>           | WLIFQRIIAREL-RFPDY-FSDEA-RDLIDRLLDLDPSRRPG--AGP-----         |
| <i>G. max2</i>           | WLIFQRIIARDL-RFPDY-FSDEA-RDLIDRLLDLDPSRRPG--AAP-----         |
| <i>V. vinifera</i>       | WLIFQRIIARDI-RFPNY-FSDEA-RDLIDRLLDTEPSRRPG--AGR-----         |
| <i>S. lycopersicum1</i>  | WLIFQRIIARDI-RFPNY-FSNEA-RDIIDQLLDVPDPSRRPG--AGP-----        |
| <i>S. lycopersicum2</i>  | WLIFQRIIARDI-RFPNY-FSNEA-RDLIDQLLDIDPSRRPG--AGP-----         |
| <i>P. patens</i>         | YLTFQKVMAREL-SIPSH-FSPEA-KDLVDSLNLKPNRNLG--V-----            |
| <i>S. moellendorffii</i> | YLTFQKVLAKDL-VIPSH-FPSAA-KELINKLLNLEPDKRPG--AGP-----         |
| <i>C. hlorella</i>       | YLTFQKIVEADY-ELPEG-GSEEA-ADLVARLLRVEPAQRIG--A-----           |
| <i>C. reinhardtii</i>    | YLTFQKITDRGL-RGPVV-YPDDA-RDLTDRLTMEPAARIGEWRSA-----          |
| <i>V. carteri</i>        | YLTFQKITDRDF-CYPEEPATAAA-RDLTDRLLEMEPSARIGE-SCA-----         |

. . : :: \*\* . \* \*

|                          |                                                          |
|--------------------------|----------------------------------------------------------|
| <i>E. siliculosus</i>    | PGGAAAAGGGAAEGKAEGRRDGGGGGFEALKGHPFFRGL-EFVGDGQPLPPSVTVP |
| <i>C. merolae</i>        | -----MRALKLHPFFKGI-DFRHLHRVDASKLLGP                      |
| <i>O. lucimarinus</i>    | -----EDETSIRSHPPFFASVSDWSTLRARKAPSVL-T                   |
| <i>O. tauri</i>          | -----ENETSIRNHPPFFAAVDDWSELRSREAPRVL-T                   |
| <i>O. sativa</i>         | -----DGYVSLKHPFFRGI-DWKNIRSTRAPKLA-M                     |
| <i>S. bicolor</i>        | -----DGYSSLKAHPFFRGI-DWKNLRKTRPPKLA-F                    |
| <i>Z. mays1</i>          | -----DGYSSLKEHPFFRGI-DWKNLRKTRPPKLA-I                    |
| <i>Z. mays2</i>          | -----DGYSSLKEHPFFRGI-DWKNLRKTRPPKLA-I                    |
| <i>A. thaliana1</i>      | -----EGYVALKRHPFFNGV-DWKNLRSQTPPKLA-P                    |
| <i>A. thaliana2</i>      | -----EGYDSLKRHPFFKGV-DWKNLRSQTPPKLA-P                    |
| <i>P. trichocarpa1</i>   | -----GGYAELKNHPFFEGV-DWKNLRGETPPKLV-S                    |
| <i>P. trichocarpa2</i>   | -----GGYAVLKNHPFFEGV-DWKNLRGETPPKLV-L                    |
| <i>R. communis</i>       | -----EGYAALKIHPFFKGI-NWKNLREETPPKLA-L                    |
| <i>G. max1</i>           | -----DGYAILKSHPPFFKGV-DWDNLRAQIPPKLA-P                   |
| <i>G. max2</i>           | -----DGYAILKRHPFFKGV-DWDNLRAQIPPKLA-P                    |
| <i>V. vinifera</i>       | -----DGYASLKMHPFFNGV-DWKNLRSQTPPKLA-M                    |
| <i>S. lycopersicum1</i>  | -----DGYASLKNHPFFSGI-DWENLRLQTPPRLA-M                    |
| <i>S. lycopersicum2</i>  | -----DGYASLKNHPFFSGV-DWDNLRLQTPPRLA-A                    |
| <i>P. patens</i>         | -----QGYDDIKNHPPFFKGF-DWSRLRKMATPKLL-K                   |
| <i>S. moellendorffii</i> | -----AGYTALKSHAFFSGI-EWLKLRQSAAPGLA-P                    |
| <i>C. hlorella</i>       | -----ADLAELQAHPFFAGI-DWDTLRSQPAPEFM-P                    |
| <i>C. reinhardtii</i>    | -----EDMAELRAHPFFAGV-DWAALRAGPAPPYL-P                    |
| <i>V. carteri</i>        | -----EDISELKAHPFFAVI-DWETLRSQPAPSF-L-P                   |

: . \* . \*\* . : : . .

# Supplemental Figure S9 contd.

Nelson Dittrich & Devarenne

*E.siliculosus* KLYELCVRALAHMVDYAEFTPLIREPFPDHVDIKRLGAGGEGVPCGTSAGGSTPGGGPA  
*C.merolae* DAFEKRDFLSFDAASSAGHAAEGFRRVTRAINSWWPRGT-----HAHRRATREPQAL  
*O.lucimarinus* ATGVGSDATVSESESESD-----TDDD-----  
*O.auri* ATGVGSDATVTDSECDHD-----DG-----  
*O.sativa* EANA-----NEDEDSQD-----SSW-LSHMGSAPVNQHVSFVNDGASSSS  
*S.bicolor* DANA-----NEDEDSQD-----SNW-LAHMGTVAVNQSQNTVGNNGAPSSS  
*Z.mays1* DANA-----NEDEDSQD-----SNW-LAHMGSVAVNQSQNTVGNNGAPSSS  
*Z.mays2* DANA-----NEDEDSQD-----SNW-LAHMGSVAVNQSQNTVGNNGAPSSS  
*A.thaliana1* DPASQT--ASPERDDTHG-----SPWNLTHIGDSLAA--TQNEGHSAPPTSS  
*A.thaliana2* DPASQS--ASPERD---G-----SPWNPTHVGDTSV---LQNDGHNGL---S  
*P.trichocarpa1* EPMVQS----GSDHDHSG-----SPYNPTRAGDSSL---TQNDGNAGVSSSA  
*P.trichocarpa2* EPMAQS----GDNDHDPG-----SPFNPTHIGDSSM---TQNDANVGVSSSA  
*R.communis* EAMTQS----GDGELDPD-----ATWNPTHIGDGSA---RQNDGTGGPSSTA  
*G.max1* EPGTQS----PASDDVHD-----SSWSPSHIGDGSAAASVRQPDGAT----SS  
*G.max2* EPGTQS----PVADDVHD-----SSWSPSHIGDGSAAASVRQPDGAT----SS  
*V.vinifera* EAMAHS----SEGDDGQD-----SWNPAHIGDGSA---RQNDGNSGATSSS  
*S.lycopersicum1* EPKAPS---THSSGDEQD-----PSWNPISHIGDGSV---RPNDGNGAAASVS  
*S.lycopersicum2* EPKGHS---TRTSGEDHD-----PSWNPISHIGDGSV---RPNDGNGGTPSSS  
*P.patens* DPNTES---LDEE-----EKWQAGII-----  
*S.moellendorffii* SPSSQGGGNGAESDDSEN-----SDWDLAHLGGRVS-RLDVSDASSPMSSSN  
*C.hlorella* DI-----DPGEQLV-----GSWRAAGIPA-----  
*C.reinhardtii* PRVPGA--PGSDGGYEEG-----LDWELTSL-----  
*V.carteri* PTPPGG--AG-DG--EEG-----WDWELTSL-----

*E.siliculosus* AAAANAALKRR----RGFVERTRHYLRLRLQLRPKVHRLFHPSAVDAKSLRADPIMR  
*C.merolae* QDAGAKELFAAH-----EKWRQPARRVLNLSDFGTGNPILASAIELVESLLQRIRR  
*O.lucimarinus* -----EEWRA-----  
*O.auri* -----TDTDEWRARV-----NAAA-----  
*O.sativa* EVRSHISRLASI----DSFDSRWQDFL-----EPGESVVLISKLKKINKLTKKVVQ  
*S.bicolor* EVRSHISKLSSI----DSFDSKWQEFLL-----DPGESVVLISKLKKINKLANKKVQ  
*Z.mays1* EVRSHISKLASI----DSFDSKWQEFLL-----DPGESVVLISKLKKINKLANKKIQ  
*Z.mays2* EVRSHISKLASI----DSFDSKWQEFLL-----DPGESVVLISKLKKINKLANKKIQ  
*A.thaliana1* ESSGSITRLASI----DSFDSRWQQFL-----EPGESVLMISAVKKLQKITSKKVQ  
*A.thaliana2* ESSGSITRLASI----DSFDSRWQQFL-----EPGESVLMISAVKKLQKITSKKVQ  
*P.trichocarpa1* EATAHITRLASI----DSFDSKWQQFL-----DPGESVLMIAMVKKLQKLTSSKKVQ  
*P.trichocarpa2* EATSHIARLASI----DSFDSKWQQFL-----DPGESVVMISMVKKLQKLTSSKKVQ  
*R.communis* EASGSITRLASI----DSFDSKWQQFL-----DPGESVLMISMVKKLQKLTSSKKVQ  
*G.max1* EGTGHITRLASI----DSFDSKWQQFL-----EPGESVLMISMVKKLQKLTSSKKVQ  
*G.max2* EGTGHITRLASI----DSFDSKWQQFL-----EPGESVLMISMVKKLQKLTSSKKVQ  
*V.vinifera* EAPGSVTRLASI----DSFDSKWQQFL-----EQGESVLMISMVKKIQKLTSSKKVQ  
*S.lycopersicum1* EAGNSITRLASI----DSFDSKWQKQFL-----DPGESVLMISMVKKLQKLTSSKKVQ  
*S.lycopersicum2* EA-NSVTRLASI----DSFDSKWQKQFL-----EPGESVLMISNVKKIQKLTSSKKVQ  
*P.patens* -----DGLDAFVYDV-----  
*S.moellendorffii* EPSSPSAVLASAARLLDENVEHPWQKFL-----FEGETILASSRVRKFRKLSVKKRQ  
*C.hlorella* -----TYW-----  
*C.reinhardtii* -----VR-----DAAES-----  
*V.carteri* -----VR-----DAADGL-----

*E.siliculosus* EYLGLDWESQGHWDPEFFFIQIADPQLGMVKADGPV-----  
*C.merolae* ECMQHRKLPSEEYLFAASQLQSADPRTLTDHAKIRFWVVLNVNMFIVRVMVHGAPVRS  
*O.lucimarinus* -----  
*O.auri* -----  
*O.sativa* -----LILTDKPQLICVDPSKMKVTK-----  
*S.bicolor* -----LILTDKPQLICVDPSKMKVAK-----  
*Z.mays1* -----LILTDKPQLICVDPSKMKVAK-----  
*Z.mays2* -----LILTDKPQLICVDPSKMKVAK-----  
*A.thaliana1* -----LILTNPKPLIYVDPSKLVVK-----  
*A.thaliana2* -----LILTNPKPLIYVDPSKLVVK-----  
*P.trichocarpa1* -----LILTNPKPLIYVDPSKLVVK-----  
*P.trichocarpa2* -----LILTNPKPLIYVDPSKLVVK-----  
*R.communis* -----LILTNPKPLIYVDPSKLVVK-----  
*G.max1* -----LILTNPKPLIYVDPSKLVVK-----  
*G.max2* -----LILTNPKPLIYVDPSKLVVK-----  
*V.vinifera* -----LILTNPKPLIYVDPKLMVK-----  
*S.lycopersicum1* -----LILTNPKPLIYVDPSKLVVK-----  
*S.lycopersicum2* -----LILTNPKPLIYVDPSKLVVK-----  
*P.patens* -----  
*S.moellendorffii* -----LILTDRPRLFVHPKLVFK-----  
*C.hlorella* -----  
*C.reinhardtii* -----  
*V.carteri* -----

# Supplemental Figure S9 contd.

Nelson Dittrich & Devarenne

```

E.siliculosus -----GGAVWEIEAERLSRVVGI VNR LR---PKFLLVTGDMTHAPPGN-----EYYEG
C.merolae LRDNRFFGEYFYRVFTLDYCLDDIENGILRVPGPF FRSWERDDPRRELALKHLHPKIVDM
O.lucimarinus -----RVNAAT-----AALDA
O.tauri -----AALDA
O.sativa -----GNIMWSDDPSELNVQVSNSSHFRICTPKKVSSFEDAKQRAWQWK----KAIED
S.bicolor -----GNI IWSDDPSELSVQVSDSSHFRICTPKKVSTFEDAKQRAWQWK----KAIED
Z.mays1 -----GNI IWSDDPSELSVQVSDSSHFRICTPKKVSTFEDAKQRAWQWK----KAIED
Z.mays2 -----GNI IWSDDPSELSVQVSDSSHFRICTPKKVSTFEDAKQRAWQWK----KAIED
A.thaliana1 -----GNI IWSDNSNDLNVVVVTS PSHFKICTPKKVL SFEDAKQRASVWK----KA IET
A.thaliana2 -----GNI IWSDNSNDLNVQVSSPSHF KICTPKKVL SFEDAKQRALQWK----KA IET
P.trichocarpa1 -----GNI IWSDNSDDL SVQVTSPSHFKICTPKK VRSFEDAKQRAWQWK----KA IES
P.trichocarpa2 -----GNI IWSDNSDDL SVQVTSPSHFKICTPKK VRSFEDVKQRAWQWK----KA IES
R.communis -----GNI IWSDNSNDLSVQVSSPSHF KIFT PKKVMSFEDAKQRAWQWK----KA IES
G.max1 -----GNI IWSDNPNDLSIQVASPSNFKICTPKKVMSFEDAKQRAWQWK----KA IEG
G.max2 -----GNI IWSDNPNDLSIQVASPSNFKICTPKKVMSFEDAKQRACQWK----KA IEG
V.vinifera -----GNI IWSDNPNDLSIQVTSPSHFKICTPKKVMSFEDSKQRAWQWK----KA IEG
S.lycopersicum1 -----GNI IWSDNPNDLSIQVTSPSQFKICTPKKVMSFEDAKNRAQQWK----KA IEA
S.lycopersicum2 -----GNI IWSDNSNDLNIQVISPSQFK---PKKVMSFEDAKQRAMQWK----KA IET
P.patens -----
S.moellendorffii -----GEV PWS---RDIYVRVENDLKF CICTPKR TYNLEDTKGQARVWK----ESIEK
C.hlorella -----
C.reinhardtii -----
V.carteri -----

```

```

E.siliculosus QPRII-----
Cmerolae LHRIRVSRGMADIPELDH LTETNLLGQA AFEDDGLIETD TERTTLTL
Olucimarinus L-----
Otauri L-----
Osativa LQRCQKN-----
Sbicolor LQRCQRN-----
Zmays1 LQRCQRN-----
Zmays2 LQRCQRN-----
Athaliana1 LQNR-----
Athaliana2 LQNR-----
Ptrichocarpa1 LQNQ-----
Ptrichocarpa2 LQNQ-----
Rcommunis LQNQ-----
Gmax1 LQNR-----
Gmax2 LQNR-----
Vvinifera LQNR-----
Slycopersicum1 LQNR-----
Slycopersicum2 LQNR-----
Ppatens -----
Smoellendorffii LVNAK-----
Chlorella -----
Creinhardtii -----
Vcarteri -----

```

**Figure S9.** Alignment of PDK1 proteins used for phylogenetic analysis. MUSCLE (<http://www.ebi.ac.uk/Tools/msa/muscle/>) was used to align protein sequences. Kinase domains are highlighted in yellow, ATP coordinating lysine is highlighted in green, and the PIF-binding pocket residues mutated in *Pp*PDK1 are highlighted in blue.
